# Supplementary material for: Facile preparation of CF3-substituted carbinols with an azine donor and subsequent kinetic resolution through stereoselective Si–O coupling
Source: Royal Society of Chemistry journal article supplement (doi:10.1039/b911534j), 2009-01-01

# Facile preparation of CF<sub>3</sub>-substituted carbinols with an azine donor and subsequent kinetic resolution through stereoselective Si–O coupling

Anne Steves and Martin Oestreich\*

*Organisch-Chemisches Institut, Westfälische Wilhelms-Universität Münster,  
Corrensstrasse 40, D-48149 Münster, Germany  
e-mail: martin.oestreich@uni-muenster.de*

## Electronic Supplementary Information

### Contents

|   |                                                                                                         |    |
|---|---------------------------------------------------------------------------------------------------------|----|
| 1 | General information                                                                                     | S2 |
| 2 | Synthesis of <i>rac</i> -1,1,1-trifluoro-3-(4-methylpyridin-2-yl)propan-2-ol ( <i>rac</i> - <b>10</b> ) | S2 |
| 3 | Characterisation data of <b>11–19</b> and <b>21</b>                                                     | S3 |
| 4 | <sup>1</sup> H, <sup>13</sup> C and <sup>19</sup> F NMR spectra of all new compounds                    | S8 |

## 1 General information

Reagents obtained from commercial suppliers were used without further purification unless otherwise noted. All reactions were performed in flame-dried glassware under a static pressure of argon. Liquids and solutions were transferred with syringes. Solvents were dried prior to use following standard procedures. Technical grade solvents for chromatography (cyclohexane, *t*-butyl methyl ether, dichloromethane, methanol) were distilled prior to use. Analytical thin layer chromatography was performed on silica gel SIL G-25 glass plates by *Macherey-Nagel* and flash chromatography on silica gel 60 (40-63  $\mu\text{m}$ , 230-400 mesh, ASTM) by *Merck* using the indicated solvents.  $^1\text{H}$ ,  $^{13}\text{C}$  and  $^{19}\text{F}$  NMR spectra were recorded in  $\text{CDCl}_3$  on *Bruker AV 300* and *Bruker AV 400* instruments. Chemical shifts are reported relative to  $\text{CDCl}_3$  in ppm for  $^1\text{H}$  NMR ( $\delta = 7.26$  ppm) and for  $^{13}\text{C}$  NMR ( $\delta = 77.0$  ppm).  $^{19}\text{F}$  NMR were recorded without internal standard. Data are reported as follows: chemical shift, multiplicity (s = singlet, d = doublet, t = triplet, q = quartet, m = multiplet,  $m_c$  = centrosymmetrical multiplet, br = broad), coupling constants (Hz) and integration. AB signals in the  $^1\text{H}$  NMR spectra were denoted by the symbol "°". Infrared spectra were recorded on a *Digilab Excalibur Series FTS 4000* spectrometer. Intensities of the bands are abbreviated as broad (br), strong (s), medium (m), and weak (w). Gas liquid chromatography (GLC) was performed on a *Shimadzu GC-17A* with a SE-54 (30 m  $\times$  0.32 mm  $\times$  0.25  $\mu\text{m}$  film thickness) column by *CS-Chromatographie Service* using the following program: column flow 1.7 mL/min  $\text{N}_2$ , start at 40  $^\circ\text{C}$ , heat rate 10  $^\circ\text{C}/\text{min}$  to 280  $^\circ\text{C}$ , 5 min at 280  $^\circ\text{C}$ . Enantiomeric ratios were determined by analytical HPLC analysis on an *Agilent 1200 Series* instrument with a chiral stationary phase using *Daicel Chiralpak IA* and *Daicel Chiralpak IB* columns (*n*-heptane:*i*-propanol mixtures as solvent). Optical rotations were measured on a *Perkin Elmer 341* polarimeter. Melting points (m.p.) were determined with a *Stuart Scientific MP3* apparatus and are not corrected. High resolution mass spectrometry (HRMS) was performed by electron spray ionization mass spectrometry (ESI-MS) using a *Bruker MicroTOF* instrument, elemental analysis were obtained using a *Elementaranalysensysteme VarioEL III* instrument.

## 2 Synthesis of 1,1,1-Trifluoro-3-(4-methylpyridin-2-yl)propan-2-ol (*rac*-10)

1,1,1-Trifluoro-3-pyridin-2-ylpropan-2-one was prepared according to literature procedure.<sup>1</sup> The ketone (1.89 g, 10.0 mmol, 1.00 equiv.) was dissolved in methanol (15 mL) and  $\text{CeCl}_3 \cdot 7\text{H}_2\text{O}$  (4.66 g, 12.5 mmol, 1.25 equiv.) was added. The reaction mixture was vigorously stirred for 15 min. After cooling to 0  $^\circ\text{C}$   $\text{NaBH}_4$  (757 mg, 20.0 mmol, 2.00 equiv.) was added. The reaction mixture was then allowed to warm to room temperature and maintained at ambient temperature for 5 h. The reaction mixture was cooled to 0  $^\circ\text{C}$ , and treated with aqueous HCl (2M, 10 mL) and diluted with *t*-butyl methyl ether (20 mL). The organic phase was separated, the aqueous phase was extracted with dichloromethane (3  $\times$  25 mL), and the combined organic extracts were washed with brine (20 mL) and dried over  $\text{MgSO}_4$ . The solvents were evaporated under reduced pressure and the resulting residue

<sup>1</sup> M. Kawase, M. Teshima, S. Saito and S. Tani, *Heterocycles*, 1998, **48**, 2103–2109.

was purified by flash column chromatography on silica gel (cyclohexane:*t*-butyl methyl ether mixture as eluent) affording the desired alcohol *rac*-**10** as a pale yellow solid (1.38 g, 72%).

### 3 Characterisation data of **11–19**

#### (<sup>Si</sup>*R*\*,*R*\*)-2-[2-(1-*tert*-Butyl-1,2,3,4-tetrahydro-1-silanaphthaloyloxy)-3,3,3-trifluoropropyl]-pyridine [(<sup>Si</sup>*R*\*,*R*\*)-**11**]

Analytical data for (<sup>Si</sup>*R*\*,*R*\*)-**11**: Yield: 97%. GLC (SE-54): *t*<sub>R</sub> = 20.4, 20.8 min. R<sub>f</sub> = 0.13 (cyclohexane:*t*-butyl methyl ether = 95:5). M.p. 68 °C. <sup>1</sup>H NMR (400 MHz, CDCl<sub>3</sub>): δ 0.83 (s, 9H), 0.99<sup>◊</sup> (ddd, *J* = 15.4, 6.7, 1.5 Hz, 1H), 1.07<sup>◊</sup> (ddd, *J* = 15.4, 5.0, 5.0 Hz, 1H), 1.53–1.68 (m, 1H), 1.90–2.02 (m, 1H), 2.49<sup>◊</sup> (ddd, *J* = 15.6, 10.7, 2.6 Hz, 1H), 2.64<sup>◊</sup> (br dd, *J* = 15.6, 5.7 Hz, 1H), 2.92<sup>◊</sup> (dd, *J* = 14.1, 9.2 Hz, 1H), 3.09<sup>◊</sup> (dd, *J* = 14.1, 2.9 Hz, 1H), 4.66 (dq, *J* = 9.2, 3.2, 2.9 Hz, 1H), 6.91–7.04 (m, 5H), 7.14–7.21 (m, 1H), 7.40 (dt, *J* = 7.6, 1.4 Hz, 1H), 8.35 (d, *J* = 4.3 Hz, 1H). <sup>13</sup>C NMR (100 MHz, CDCl<sub>3</sub>): δ 8.9, 18.9, 22.5, 25.9, 35.5, 39.9, 71.7 (q, *J* = 31 Hz), 122.0, 124.9, 125.1, 125.3 (q, *J* = 283 Hz), 128.6, 129.4, 130.3, 134.9, 136.5, 149.1, 150.3, 156.1. <sup>19</sup>F NMR (282 MHz, CDCl<sub>3</sub>): δ -77.8, -78.2. IR (ATR) 1278 (m, C–F) cm<sup>-1</sup>. HRMS (ESI) calcd for C<sub>21</sub>H<sub>26</sub>F<sub>3</sub>NOSiNa (M + Na<sup>+</sup>): 416.1628; found: 416.1626. Anal. calcd for C<sub>21</sub>H<sub>26</sub>F<sub>3</sub>NOSi (393.52): C, 64.09; H, 6.66; N, 3.56; found: C, 63.25; H, 6.87; N, 3.68. The diastereomeric ratio was determined by GLC (SE-54) – *t*<sub>R</sub> = 20.4 min (major diastereomer) and 20.8 min (minor diastereomer) – and agrees with the ratio determined by <sup>19</sup>F NMR.

Analytical data for (<sup>Si</sup>*R*,*R*)-**11** (dr = 88:12, entry 1, Table 1): Yield: 53%. [ $\alpha$ ]<sub>D</sub><sup>20</sup> = +26.3, [ $\alpha$ ]<sub>578</sub><sup>20</sup> = +27.7, [ $\alpha$ ]<sub>546</sub><sup>20</sup> = +32.2, [ $\alpha$ ]<sub>436</sub><sup>20</sup> = +64.4, [ $\alpha$ ]<sub>365</sub><sup>20</sup> = +130.1 (*c* = 0.840, CHCl<sub>3</sub>).

#### (<sup>Si</sup>*R*\*,*R*\*)-2-[2-(1-*tert*-Butyl-1,2,3,4-tetrahydro-1-silanaphthaloyloxy)-3,3,3-trifluoropropyl]-quinoline [(<sup>Si</sup>*R*\*,*R*\*)-**12**]

Analytical data for (<sup>Si</sup>*R*\*,*R*\*)-**12**: Yield: 96%. GLC (SE-54): *t*<sub>R</sub> = 24.4, 24.8 min. R<sub>f</sub> = 0.26 (cyclohexane:*t*-butyl methyl ether = 90:10). <sup>1</sup>H NMR (400 MHz, CDCl<sub>3</sub>): δ 0.74 (s, 9H), 0.90<sup>◊</sup> (ddd, *J* = 15.6, 6.7, 1.2 Hz, 1H), 1.11<sup>◊</sup> (ddd, *J* = 15.6, 5.3, 5.1 Hz, 1H), 1.70–1.81 (m, 1H), 1.93–2.02 (m, 1H), 2.47<sup>◊</sup> (ddd, *J* = 15.7, 11.1, 2.5 Hz, 1H), 2.66<sup>◊</sup> (br dd, *J* = 15.6, 5.8 Hz, 1H), 3.41<sup>◊</sup> (dd, *J* = 14.5, 3.2 Hz, 1H), 3.77<sup>◊</sup> (dd, *J* = 14.6, 9.2 Hz, 1H), 5.02 (dq, *J* = 9.2, 3.1, 3.1 Hz, 1H), 6.49–6.56 (m, 2H), 6.93 (d, *J* = 7.7 Hz, 1H), 7.02 (dt, *J* = 7.0, 1.8 Hz, 1H), 7.33 (d, *J* = 5.7 Hz, 1H), 7.54 (ddd, *J* = 7.0, 2.9, 1.2 Hz, 1H), 7.66 (ddd, *J* = 7.0, 2.4, 1.0 Hz, 1H), 7.75 (br d, *J* = 8.2 Hz, 1H), 8.01 (dd, *J* = 8.3, 0.5 Hz, 1H), 8.18 (d, *J* = 5.7 Hz, 1H). <sup>13</sup>C NMR (100 MHz, CDCl<sub>3</sub>): δ 9.0, 18.8, 22.5, 25.9, 26.1, 35.4, 71.4 (q, *J* = 31 Hz), 122.9, 124.6, 125.1, 125.3 (q, *J* = 282 Hz), 127.1, 127.6, 127.7, 128.2, 128.6, 128.7, 128.9, 129.7, 129.9, 134.4, 134.6, 149.5. <sup>19</sup>F NMR (282 MHz, CDCl<sub>3</sub>): δ -78.2, -77.8. IR (ATR) 1278 (m, C–F) cm<sup>-1</sup>. HRMS (ESI) calcd for C<sub>25</sub>H<sub>29</sub>F<sub>3</sub>NOSi (M + H<sup>+</sup>): 444.1965; found: 444.1965. Anal. calcd for C<sub>25</sub>H<sub>28</sub>F<sub>3</sub>NOSi (443.58): C, 67.69; H, 6.36; N, 3.16; found: C, 68.21; H, 6.62; N, 3.31. The diastereomeric ratio was determined by GLC (SE-54) – *t*<sub>R</sub> = 24.4 min (major diastereomer) and 24.8 min (minor diastereomer) – and agrees with the ratio determined by <sup>19</sup>F NMR.

Analytical data for (<sup>Si</sup>R,R)-**12** (dr = 77:23, entry 2, Table 1): Yield: 51%.  $[\alpha]_D^{20} = +50.1$ ,  $[\alpha]_{578}^{20} = +53.0$ ,  $[\alpha]_{546}^{20} = +62.0$ ,  $[\alpha]_{436}^{20} = +125.7$ ,  $[\alpha]_{365}^{20} = +278.6$  (c = 0.875, CHCl<sub>3</sub>).

**(<sup>Si</sup>R\*,R\*)-1-[2-(1-*tert*-Butyl-1,2,3,4-tetrahydro-1-silanaphthaloyloxy)-3,3,3-trifluoropropyl]-isoquinoline [(<sup>Si</sup>R\*,R\*)-**13**]**

Analytical data for (<sup>Si</sup>R\*,R\*)-**13**: Yield: 95%. GLC (SE-54):  $t_R = 24.6, 25.1$  min.  $R_f = 0.16$  (cyclohexane:*t*-butyl methyl ether = 90:10). M.p. 60 °C. <sup>1</sup>H NMR (400 MHz, CDCl<sub>3</sub>):  $\delta$  0.74 (s, 9H), 0.90<sup>o</sup> (ddd,  $J = 15.3, 6.6, 1.1$  Hz, 1H), 1.10<sup>o</sup> (ddd,  $J = 15.3, 10.5, 2.1$  Hz, 1H), 1.67–1.81 (m, 1H), 1.93–2.02 (m, 1H), 2.47<sup>o</sup> (ddd,  $J = 15.5, 10.8, 2.6$  Hz, 1H), 2.66<sup>o</sup> (br dd,  $J = 15.5, 6.2$  Hz, 1H), 3.41<sup>o</sup> (dd,  $J = 14.7, 3.2$  Hz, 1H), 3.77<sup>o</sup> (dd,  $J = 14.8, 9.3$  Hz, 1H), 5.02 (dq,  $J = 9.3, 3.3, 3.2$  Hz, 1H), 6.49–6.56 (m, 2H), 6.93 (d,  $J = 7.4$  Hz, 1H), 7.02 (ddd,  $J = 7.4, 5.7, 1.9$  Hz, 1H), 7.34 (d,  $J = 5.7$  Hz, 1H), 7.54 (ddd,  $J = 6.9, 5.6, 1.0$  Hz, 1H), 7.65 (ddd,  $J = 6.9, 5.7, 1.0$  Hz, 1H), 7.75 (d,  $J = 8.5$  Hz, 1H), 8.01 (dd,  $J = 8.5, 0.5$  Hz, 1H), 8.17 (d,  $J = 5.7$  Hz, 1H). <sup>13</sup>C NMR (100 MHz, CDCl<sub>3</sub>):  $\delta$  9.0, 18.7, 22.7, 25.8, 27.0, 35.5 (m), 71.3 (q,  $J = 31$  Hz), 120.0, 124.1, 125.1, 127.4, 127.5, 128.0, 128.3, 128.3 (q,  $J = 286$  Hz), 129.1, 129.9, 130.0, 134.2, 136.3, 141.5, 149.8, 156.1. <sup>19</sup>F NMR (282 MHz, CDCl<sub>3</sub>):  $\delta$  -77.9, -78.1. IR (ATR) 1275 (m, C–F) cm<sup>-1</sup>. HRMS (ESI) calcd for C<sub>25</sub>H<sub>29</sub>F<sub>3</sub>NOSi (M + H<sup>+</sup>): 444.1965; found: 444.1965. Anal. calcd for C<sub>25</sub>H<sub>28</sub>F<sub>3</sub>NOSi (443.58): C, 67.69; H, 6.36; N, 3.16; found: C, 67.36; H, 6.36; N, 3.10. The diastereomeric ratio was determined by GLC (SE-54) –  $t_R = 24.6$  min (major diastereomer) and 25.1 min (minor diastereomer) – and agrees with the ratio determined by <sup>19</sup>F NMR.

Analytical data for (<sup>Si</sup>R,R)-**13** (dr = 84:16, entry 3, Table 1): Yield: 50%.  $[\alpha]_D^{20} = -5.4$ ,  $[\alpha]_{578}^{20} = -5.7$ ,  $[\alpha]_{546}^{20} = -6.4$ ,  $[\alpha]_{436}^{20} = -3.8$ ,  $[\alpha]_{365}^{20} = +48.8$  (c = 0.740, CHCl<sub>3</sub>).

**(<sup>Si</sup>R\*,R\*)-2-[2-(1-*tert*-Butyl-1,2,3,4-tetrahydro-1-silanaphthaloyloxy)-3,3,3-trifluoropropyl]-6-methylpyridine [(<sup>Si</sup>R\*,R\*)-**14**]**

Analytical data for (<sup>Si</sup>R\*,R\*)-**14**: Yield: 98%. GLC (SE-54):  $t_R = 20.6, 21.0$  min.  $R_f = 0.20$  (cyclohexane:*t*-butyl methyl ether = 90:10). M.p. 60 °C. <sup>1</sup>H NMR (400 MHz, CDCl<sub>3</sub>):  $\delta$  0.80 (s, 9H), 0.88<sup>o</sup> (ddd,  $J = 15.3, 6.8, 1.5$  Hz, 1H), 1.03–1.13 (m, 1H), 1.61–1.74 (m, 1H), 1.94–2.02 (m, 1H), 2.37 (s, 3H), 2.50<sup>o</sup> (ddd,  $J = 15.6, 11.1, 2.1$  Hz, 1H), 2.67<sup>o</sup> (br dd,  $J = 15.6, 6.1$  Hz, 1H), 2.95<sup>o</sup> (dd,  $J = 14.0, 9.9$  Hz, 1H), 3.11<sup>o</sup> (br d,  $J = 15.6$  Hz, 1H), 4.72–4.82 (m, 1H), 6.82–6.88 (m, 2H), 6.91 (d,  $J = 2.1$  Hz, 1H), 6.93 (d,  $J = 0.8$  Hz, 1H), 7.01 (d,  $J = 7.6$  Hz, 1H), 7.17 (ddd,  $J = 7.6, 5.6, 1.1$  Hz, 1H), 7.31 (t,  $J = 7.6$  Hz, 1H). <sup>13</sup>C NMR (100 MHz, CDCl<sub>3</sub>):  $\delta$  9.2, 18.9, 22.5, 25.9, 28.9, 35.6, 39.8, 71.5 (q,  $J = 31$  Hz), 121.6, 122.0, 125.1, 125.4 (q,  $J = 284$  Hz), 128.6, 129.3, 129.7, 130.1, 134.8, 150.1, 155.5, 158.0. <sup>19</sup>F NMR (282 MHz, CDCl<sub>3</sub>):  $\delta$  -77.8, -78.2. IR (ATR) 1300 (m, C–F) cm<sup>-1</sup>. HRMS (ESI) calcd for C<sub>22</sub>H<sub>29</sub>F<sub>3</sub>NOSi (M + H<sup>+</sup>): 408.1965; found: 408.1965. Anal. calcd for C<sub>22</sub>H<sub>28</sub>F<sub>3</sub>NOSi (407.54): C, 64.84; H, 6.92; N, 3.44; found: C, 65.27; H, 6.82; N, 3.35. The diastereomeric ratio was determined by GLC (SE-54) –  $t_R = 20.6$  min (major diastereomer) and 21.0 min (minor diastereomer) – and agrees with the ratio determined by <sup>19</sup>F NMR.

Analytical data for (<sup>Si</sup>R,R)-**14** (dr = 80:20, entry 4, Table 1): Yield: 55%.  $[\alpha]_D^{20} = +26.8$ ,  $[\alpha]_{578}^{20} = +28.2$ ,  $[\alpha]_{546}^{20} = +34.4$ ,  $[\alpha]_{436}^{20} = +63.2$ ,  $[\alpha]_{365}^{20} = +123.4$  ( $c = 1.04$ , CHCl<sub>3</sub>).

**(<sup>Si</sup>R\*,R\*)-3-[2-(1-*tert*-Butyl-1,2,3,4-tetrahydro-1-silanaphthaloyloxy)-3,3,3-trifluoropropyl]-pyridazine [(<sup>Si</sup>R\*,R\*)-**15**]**

Analytical data for (<sup>Si</sup>R\*,R\*)-**15**: Yield: 95%. GLC (SE-54):  $t_R = 21.9, 22.4$  min.  $R_f = 0.21$  (cyclohexane:*t*-butyl methyl ether = 1:2). <sup>1</sup>H NMR (400 MHz, CDCl<sub>3</sub>):  $\delta$  0.86 (s, 9H), 0.87–0.93 (m, 1H), 1.07 (ddd,  $J = 15.4, 6.1, 4.4$  Hz, 1H), 1.51–1.62 (m, 1H), 1.91–2.00 (m, 1H), 2.46<sup>◊</sup> (ddd,  $J = 15.9, 10.6, 2.7$  Hz, 1H), 2.61<sup>◊</sup> (br dd,  $J = 15.9, 6.4$  Hz, 1H), 3.10<sup>◊</sup> (dd,  $J = 14.1, 9.1$  Hz, 1H), 3.37<sup>◊</sup> (dd,  $J = 14.1, 3.2$  Hz, 1H), 4.84 (dq,  $J = 9.4, 3.4, 3.2$  Hz, 1H), 6.98–7.04 (m, 2H), 7.05–7.10 (m, 2H), 7.15–7.21 (m, 2H), 8.85 (s, 1H). <sup>13</sup>C NMR (100 MHz, CDCl<sub>3</sub>):  $\delta$  8.4, 18.8, 22.4, 25.9, 35.3, 38.3, 71.8 (q,  $J = 31$  Hz), 125.1, 125.5 (q,  $J = 283$  Hz), 126.2, 128.0, 129.6, 130.0, 130.6, 134.7, 149.8, 150.0, 158.8. <sup>19</sup>F NMR (282 MHz, CDCl<sub>3</sub>):  $\delta$  -77.6, -78.3. IR (ATR) 1191 (m, C–F) cm<sup>-1</sup>. HRMS (ESI) calcd for C<sub>20</sub>H<sub>26</sub>F<sub>3</sub>N<sub>2</sub>OSi (M + H<sup>+</sup>): 395.1760; found: 395.1761. The diastereomeric ratio was determined by GLC (SE-54) –  $t_R = 21.9$  min (major diastereomer) and 22.4 min (minor diastereomer) – and agrees with the ratio determined by <sup>19</sup>F NMR.

Analytical data for (<sup>Si</sup>R,R)-**15** (dr = 80:20, entry 5, Table 1): Yield: 29%.  $[\alpha]_D^{20} = +30.9$ ,  $[\alpha]_{578}^{20} = +33.1$ ,  $[\alpha]_{546}^{20} = +38.2$ ,  $[\alpha]_{436}^{20} = +77.7$ ,  $[\alpha]_{365}^{20} = +186.9$  ( $c = 0.710$ , CHCl<sub>3</sub>).

**(<sup>Si</sup>R\*,R\*)-4-[2-(1-*tert*-Butyl-1,2,3,4-tetrahydro-1-silanaphthaloyloxy)-3,3,3-trifluoropropyl]-pyrimidine [(<sup>Si</sup>R\*,R\*)-**16**]**

Analytical data for (<sup>Si</sup>R\*,R\*)-**16**: Yield: 54%. GLC (SE-54):  $t_R = 20.6, 21.0$  min.  $R_f = 0.30$  (cyclohexane:*t*-butyl methyl ether = 1:8). <sup>1</sup>H NMR (400 MHz, CDCl<sub>3</sub>):  $\delta$  0.86 (s, 9H), 0.90–0.96 (m, 1H), 1.10 (ddd,  $J = 15.9, 5.4, 5.4$  Hz, 1H), 1.61–1.72 (m, 1H), 1.96–2.03 (m, 1H), 2.51<sup>◊</sup> (ddd,  $J = 15.9, 10.9, 2.8$  Hz, 1H), 2.67<sup>◊</sup> (br dd,  $J = 15.9, 6.6$  Hz, 1H), 2.96<sup>◊</sup> (dd,  $J = 14.5, 9.1$  Hz, 1H), 3.10<sup>◊</sup> (dd,  $J = 14.1, 3.1$  Hz, 1H), 4.80 (dq,  $J = 9.4, 3.1, 3.1$  Hz, 1H), 6.95 (br t,  $J = 7.5$  Hz, 1H), 6.99–7.05 (m, 3H), 7.21 (ddd,  $J = 7.5, 7.5, 1.5$  Hz, 1H), 8.37 (br s, 1H), 8.81 (s, 1H). <sup>13</sup>C NMR (100 MHz, CDCl<sub>3</sub>):  $\delta$  8.6, 18.8, 22.6, 25.9, 35.4, 39.5, 70.8 (q,  $J = 31$  Hz), 122.3, 125.1 (q,  $J = 282$  Hz), 125.2, 128.8, 129.8, 130.5, 134.4, 149.8, 156.4, 158.3, 165.1. <sup>19</sup>F NMR (282 MHz, CDCl<sub>3</sub>):  $\delta$  -77.8, -78.4. IR (ATR) 1278 (br, C–F) cm<sup>-1</sup>. HRMS (ESI) calcd for C<sub>20</sub>H<sub>25</sub>F<sub>3</sub>N<sub>2</sub>OSiNa (M + Na<sup>+</sup>): 417.1580; found: 417.1576. The diastereomeric ratio was determined by GLC (SE-54) –  $t_R = 20.6$  min (major diastereomer) and 21.0 min (minor diastereomer) – and agrees with the ratio determined by <sup>19</sup>F NMR.

Analytical data for (<sup>Si</sup>R,R)-**16** (dr = 79:21, entry 6, Table 1): Yield: 52%.  $[\alpha]_D^{20} = +25.3$ ,  $[\alpha]_{578}^{20} = +26.4$ ,  $[\alpha]_{546}^{20} = +30.5$ ,  $[\alpha]_{436}^{20} = +57.8$ ,  $[\alpha]_{365}^{20} = +108.2$  ( $c = 0.790$ , CHCl<sub>3</sub>).

**(<sup>Si</sup>R\*,R\*)-2-[2-(1-tert-Butyl-1,2,3,4-tetrahydro-1-silanaphthalylloxy)-3,3,3-trifluoropropyl]-pyrazine [(<sup>Si</sup>R\*,R\*)-17]**

Analytical data for (<sup>Si</sup>R\*,R\*)-17: Yield: 33%. GLC (SE-54):  $t_R$  = 20.5, 20.9 min.  $R_f$  = 0.28 (cyclohexane:*t*-butyl methyl ether = 1:2). <sup>1</sup>H NMR (400 MHz, CDCl<sub>3</sub>):  $\delta$  0.85 (s, 9H), 0.94<sup>o</sup> (ddd,  $J$  = 15.6, 6.8, 2.2 Hz, 1H), 1.11 (ddd,  $J$  = 15.6, 5.4, 4.9 Hz, 1H), 1.68–1.76 (m, 1H), 1.98–2.07 (m, 1H), 2.53<sup>o</sup> (ddd,  $J$  = 15.8, 10.9, 2.7 Hz, 1H), 2.70<sup>o</sup> (br dd,  $J$  = 15.7, 6.3 Hz, 1H), 3.06<sup>o</sup> (dd,  $J$  = 14.5, 9.0 Hz, 1H), 3.13<sup>o</sup> (dd,  $J$  = 14.5, 3.5 Hz, 1H), 4.71 (dq,  $J$  = 9.4, 3.6, 3.5 Hz, 1H), 6.88–6.93 (m, 3H), 7.00 (d,  $J$  = 7.7 Hz, 1H), 7.15–7.19 (m, 1H), 8.13 (s, 1H), 8.19 (br s, 1H), 8.35 (br s, 1H). <sup>13</sup>C NMR (100 MHz, CDCl<sub>3</sub>):  $\delta$  8.8, 18.8, 22.7, 25.8, 35.5, 36.9, 70.8 (q,  $J$  = 31 Hz), 125.2 (q,  $J$  = 280 Hz), 125.3, 128.6, 129.5, 130.3, 134.3, 142.8, 144.2, 145.2, 149.9, 152.2. <sup>19</sup>F NMR (282 MHz, CDCl<sub>3</sub>):  $\delta$  -77.8, -78.3. IR (ATR) 1272 (m, C–F) cm<sup>-1</sup>. HRMS (ESI) calcd for C<sub>20</sub>H<sub>25</sub>F<sub>3</sub>N<sub>2</sub>OSiNa (M + Na<sup>+</sup>): 417.1580; found: 417.1580. Anal. calcd for C<sub>20</sub>H<sub>25</sub>F<sub>3</sub>N<sub>2</sub>OSi (394.51): C, 60.89; H, 6.39; N, 7.10; found: C, 60.48; H, 6.42; N, 6.89. The diastereomeric ratio was determined by GLC (SE-54) –  $t_R$  = 20.5 min (major diastereomer) and 20.9 min (minor diastereomer) – and agrees with the ratio determined by <sup>19</sup>F NMR.

Analytical data for (<sup>Si</sup>R,R)-17 (dr = 85:15, entry 7, Table 1): Yield: 53%.  $[\alpha]_D^{20} = +42.3$ ,  $[\alpha]_{578}^{20} = +44.6$ ,  $[\alpha]_{546}^{20} = +51.1$ ,  $[\alpha]_{436}^{20} = +98.9$  ( $c$  = 1.10, CHCl<sub>3</sub>).

**(<sup>Si</sup>R\*,R\*)-2-[2-(1-tert-Butyl-1,2,3,4-tetrahydro-1-silanaphthalylloxy)-3,3,3-trifluoropropyl]-6-chloropyridine [(<sup>Si</sup>R\*,R\*)-18]**

Analytical data for (<sup>Si</sup>R\*,R\*)-18: Yield: 93%. GLC (SE-54):  $t_R$  = 21.8, 22.2 min.  $R_f$  = 0.14 (cyclohexane:*t*-butyl methyl ether = 90:10). <sup>1</sup>H NMR (400 MHz, CDCl<sub>3</sub>):  $\delta$  0.82 (s, 9H), 0.89<sup>o</sup> (ddd,  $J$  = 15.5, 6.9, 1.4 Hz, 1H), 1.10 (ddd,  $J$  = 15.5, 10.4, 2.4 Hz, 1H), 1.69–1.80 (m, 1H), 1.96–2.05 (m, 1H), 2.46–2.55 (m, 1H), 2.71<sup>o</sup> (br dd,  $J$  = 15.9, 6.4 Hz, 1H), 2.94<sup>o</sup> (dd,  $J$  = 14.3, 9.9 Hz, 1H), 3.11<sup>o</sup> (dd,  $J$  = 14.3, 2.5 Hz, 1H), 4.71 (dq,  $J$  = 9.4, 2.7, 2.5 Hz, 1H), 6.92 (d,  $J$  = 4.1 Hz, 1H), 6.94 (d,  $J$  = 3.5 Hz, 1H), 6.98 (d,  $J$  = 7.3 Hz, 1H), 7.00–7.06 (m, 2H), 7.17 (dt,  $J$  = 7.8, 1.5 Hz, 1H), 7.31 (t,  $J$  = 7.8 Hz, 1H). <sup>13</sup>C NMR (100 MHz, CDCl<sub>3</sub>):  $\delta$  8.9, 18.8, 22.4, 25.9, 35.5, 39.3, 71.2 (q,  $J$  = 31 Hz), 122.6, 123.4, 125.1, 126.6, 126.6 (q,  $J$  = 281 Hz), 128.7, 129.5, 134.6, 139.0, 149.9, 150.9, 157.1. <sup>19</sup>F NMR (282 MHz, CDCl<sub>3</sub>):  $\delta$  -77.7, -78.3. IR (ATR) 1272 (m, C–F) cm<sup>-1</sup>. HRMS (ESI) calcd for C<sub>21</sub>H<sub>26</sub>F<sub>3</sub>ClNOSi (M + H<sup>+</sup>): 428.1419; found: 428.1423. Anal. calcd for C<sub>21</sub>H<sub>25</sub>F<sub>3</sub>ClNOSi (427.96): C, 58.94; H, 5.89; N, 3.27; found: C, 59.40; H, 5.92; N, 3.29. The diastereomeric ratio was determined by GLC (SE-54) –  $t_R$  = 21.8 min (major diastereomer) and 22.2 min (minor diastereomer) – and agrees with the ratio determined by <sup>19</sup>F NMR.

Analytical data for (<sup>Si</sup>R,R)-18 (dr = 76:24, entry 8, Table 1): Yield: 58%.  $[\alpha]_D^{20} = +40.1$ ,  $[\alpha]_{578}^{20} = +42.3$ ,  $[\alpha]_{546}^{20} = +48.7$ ,  $[\alpha]_{436}^{20} = +58.3$ ,  $[\alpha]_{365}^{20} = +170.2$  ( $c$  = 1.01, CHCl<sub>3</sub>).

**(<sup>Si</sup>R\*,R\*)-2-[2-(1-tert-Butyl-1,2,3,4-tetrahydro-1-silanaphthalylloxy)-3,3,3-trifluoropropyl]-4-methylpyridine [(<sup>Si</sup>R\*,R\*)-19]**

Analytical data for (<sup>Si</sup>R\*,R\*)-19: Yield: 97%. GLC (SE-54):  $t_R$  = 21.1, 21.5 min.  $R_f$  = 0.11 (cyclohexane:*t*-butyl methyl ether = 90:10). <sup>1</sup>H NMR (400 MHz, CDCl<sub>3</sub>):  $\delta$  0.83 (s, 9H), 0.88<sup>o</sup> (ddd,  $J$  = 15.3,

6.8, 1.3 Hz, 1H), 1.02–1.09 (m, 1H), 1.55–1.67 (m, 1H), 1.92–2.00 (m, 1H), 2.20 (s, 3H), 2.48<sup>◊</sup> (ddd,  $J = 15.9, 10.9, 2.6$  Hz, 1H), 2.64<sup>◊</sup> (br dd,  $J = 15.8, 6.5$  Hz, 1H), 2.91<sup>◊</sup> (dd,  $J = 14.1, 9.4$  Hz, 1H), 3.11<sup>◊</sup> (dd,  $J = 14.1, 2.8$  Hz, 1H), 4.71 (dq,  $J = 9.4, 3.1, 2.8$  Hz, 1H), 6.81 (d,  $J = 5.0$  Hz, 1H), 6.82 (s, 1H), 6.92–6.96 (m, 2H), 6.99 (d,  $J = 7.3$  Hz, 1H), 7.16 (ddd,  $J = 7.3, 5.2, 2.7$  Hz, 1H), 8.20 (d,  $J = 5.0$  Hz, 1H). <sup>13</sup>C NMR (100 MHz, CDCl<sub>3</sub>):  $\delta$  8.8, 18.9, 21.1, 22.5, 25.8, 35.5, 39.7, 71.7 (q,  $J = 31$  Hz), 123.0, 124.9, 125.2 (q,  $J = 283$  Hz), 126.0, 128.5, 129.4, 130.3, 134.8, 147.8, 148.9, 150.0, 155.9. <sup>19</sup>F NMR (282 MHz, CDCl<sub>3</sub>):  $\delta$  -77.9, -78.2. IR (ATR) 1297 (m, C–F) cm<sup>-1</sup>. HRMS (ESI) calcd for C<sub>22</sub>H<sub>29</sub>F<sub>3</sub>NOSi (M + H<sup>+</sup>): 408.1965; found: 408.1964. Anal. calcd for C<sub>22</sub>H<sub>28</sub>F<sub>3</sub>NOSi (407.54): C, 64.84; H, 6.92; N, 3.44; found: C, 64.78; H, 7.02; N, 3.32. The diastereomeric ratio was determined by GLC (SE-54) –  $t_R = 21.1$  min (major diastereomer) and 21.5 min (minor diastereomer) – and agrees with the ratio determined by <sup>19</sup>F NMR.

Analytical data for (<sup>Si</sup>R,R)-**19** (dr = 76:24, entry 9, Table 1): Yield: 55%.  $[\alpha]_D^{20} = +12.5$ ,  $[\alpha]_{578}^{20} = +12.6$ ,  $[\alpha]_{546}^{20} = +15.7$ ,  $[\alpha]_{436}^{20} = +33.9$  ( $c = 0.830$ , CHCl<sub>3</sub>).

**(<sup>Si</sup>R\*,R\*)-1-(1-Benzyl-2,2,2-trifluoroethoxy)-1-tert-butyl-1,2,3,4-tetrahydro-1-silanaphthalene [(<sup>Si</sup>R\*,R\*)-21]**

Analytical data for (<sup>Si</sup>R\*,R\*)-**21**: Yield: 32%. GLC (SE-54):  $t_R = 20.3, 20.5$  min.  $R_f = 0.21$  (cyclohexane:*t*-butyl methyl ether = 90 : 10). <sup>1</sup>H NMR (400 MHz, CDCl<sub>3</sub>):  $\delta$  0.89 (s, 9H), 0.94–0.98 (m, 1H), 1.02–1.09 (m, 1H), 1.54–1.65 (m, 1H), 1.95–2.04 (m, 1H), 2.50–2.58 (m, 1H), 2.70<sup>◊</sup> (br dd,  $J = 15.5, 6.1$  Hz, 1H), 2.85<sup>◊</sup> (dd,  $J = 14.1, 8.4$  Hz, 1H), 3.04<sup>◊</sup> (dd,  $J = 14.1, 4.2$  Hz, 1H), 4.71 (dq,  $J = 9.5, 4.4, 4.2$  Hz, 1H), 6.91 (dd,  $J = 7.6, 1.3$  Hz, 1H), 7.01 (br t,  $J = 7.4$  Hz, 1H), 7.06–7.09 (m, 2H), 7.19–7.32 (m, 5H). <sup>13</sup>C NMR (100 MHz, CDCl<sub>3</sub>):  $\delta$  9.7, 18.9, 22.7, 26.0, 35.6, 38.2, 73.3 (q,  $J = 33$  Hz), 125.3 (q,  $J = 283$  Hz), 125.3, 126.9, 128.5, 128.7, 128.8, 129.6, 129.8, 129.9, 130.0, 135.2, 136.4, 150.7. <sup>19</sup>F NMR (282 MHz, CDCl<sub>3</sub>):  $\delta$  -77.6, -77.4. IR (ATR) 1276 (m, C–F) cm<sup>-1</sup>. HRMS (ESI) calcd for C<sub>22</sub>H<sub>27</sub>F<sub>3</sub>OSiNa (M + Na<sup>+</sup>): 415.1675; found: 415.1673. The diastereomeric ratio was determined by GLC (SE-54) –  $t_R = 20.3$  min (major diastereomer) and 20.5 min (minor diastereomer) – and agrees with the ratio determined by <sup>19</sup>F NMR.

**4**  $^1\text{H}$ ,  $^{13}\text{C}$  and  $^{19}\text{F}$  NMR spectra of all new compounds*rac-2* ( $^1\text{H}$ ):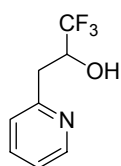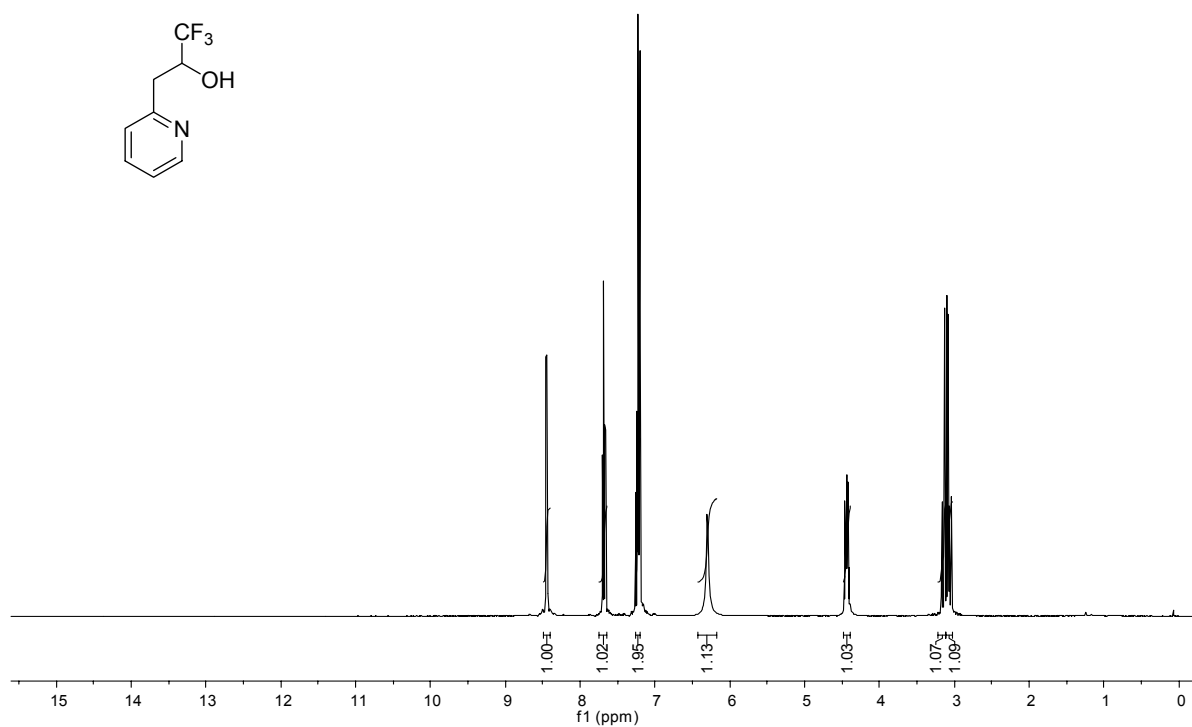*rac-2* ( $^{13}\text{C}$ ):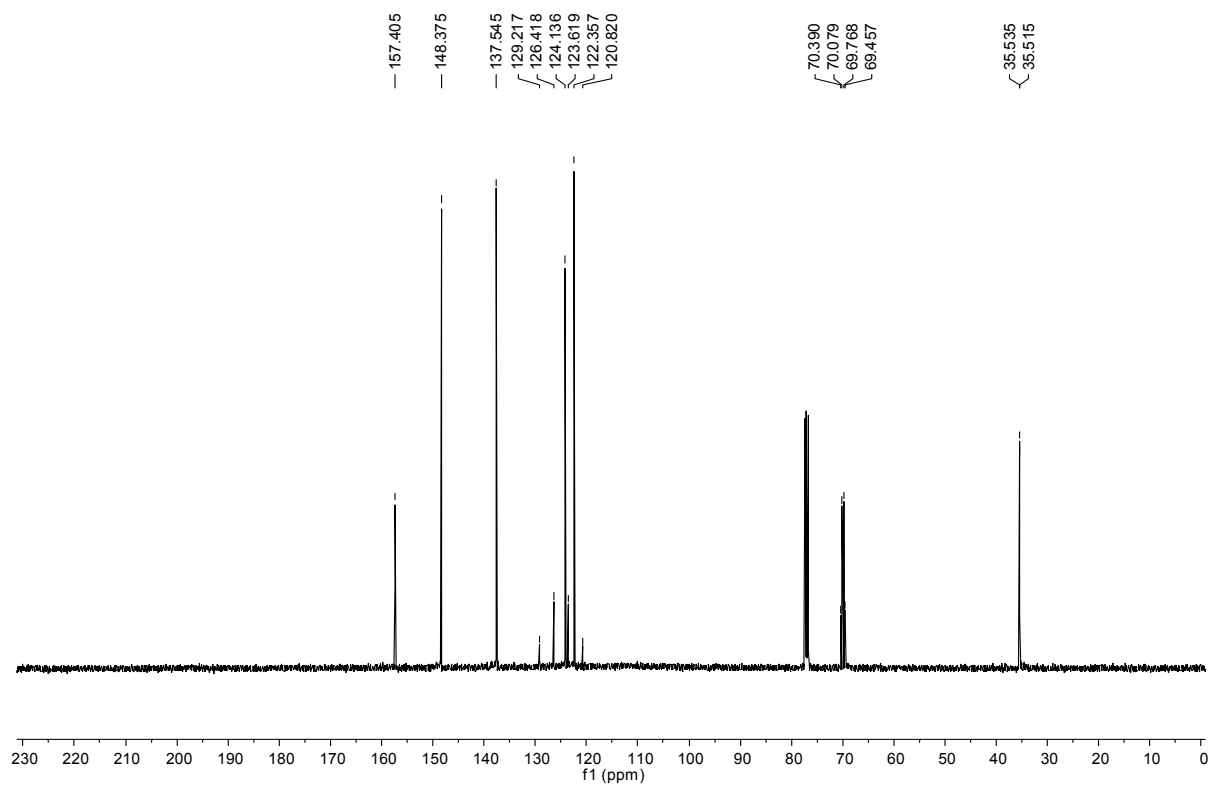



*rac-2* ( $^{19}\text{F}$ ):

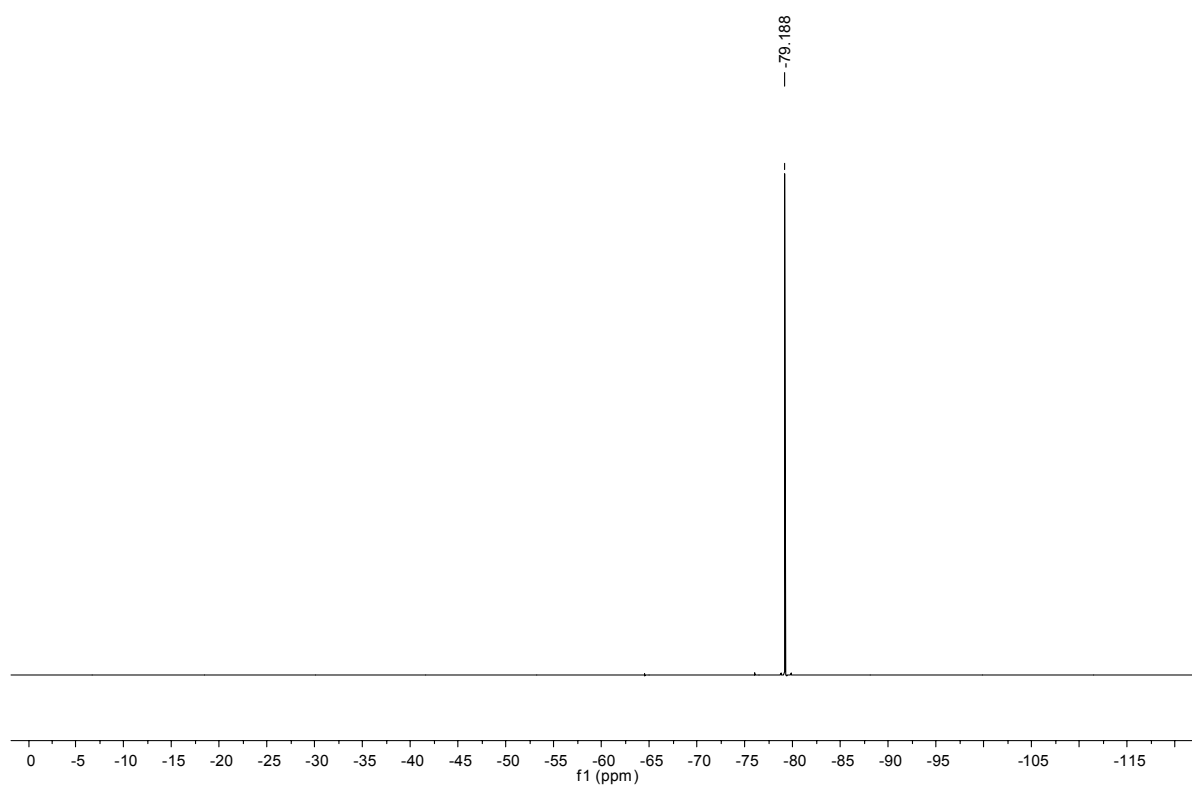

*rac-3* ( $^1\text{H}$ ):

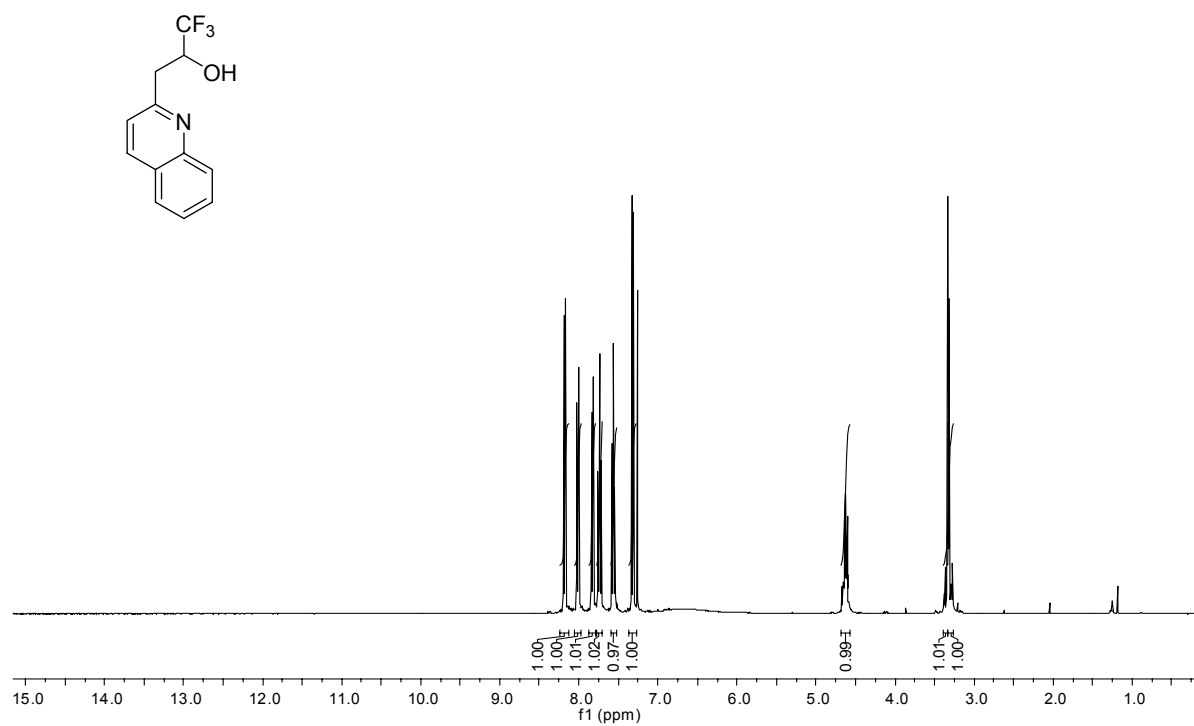

*rac-3* ( $^{13}\text{C}$ ):

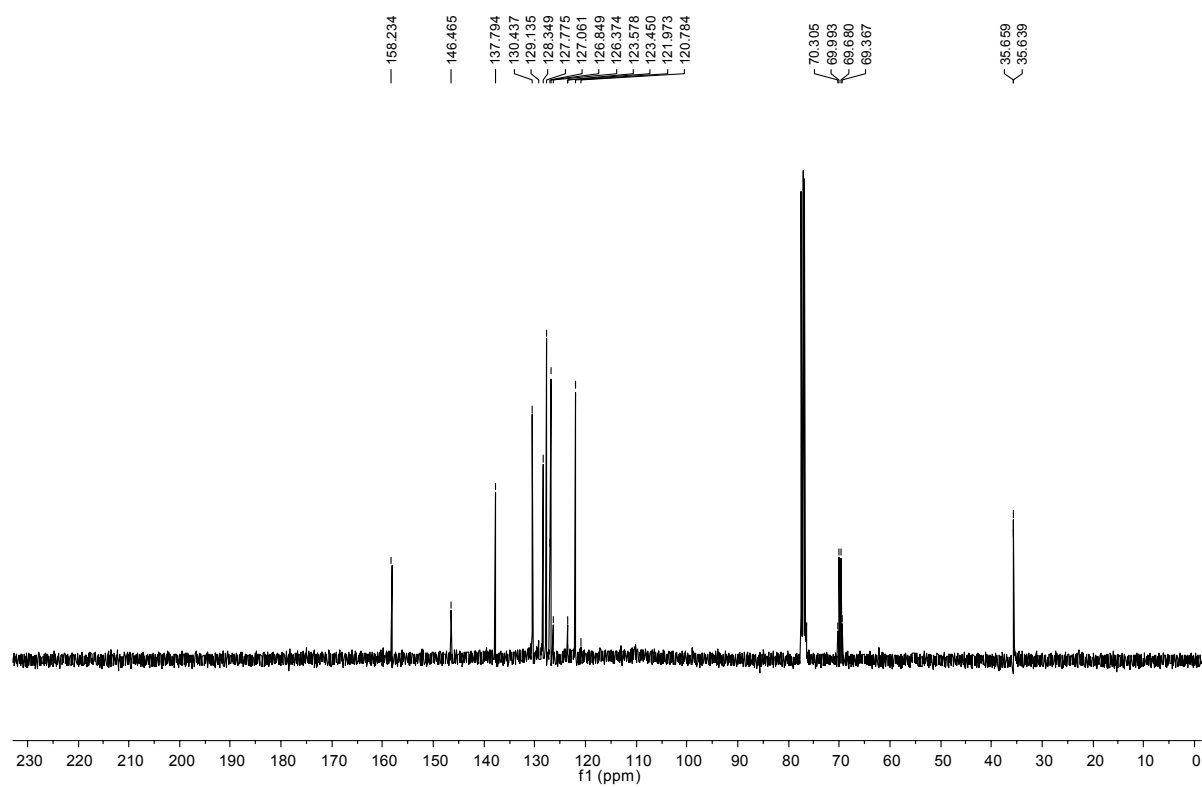

*rac-3* ( $^{19}\text{F}$ ):

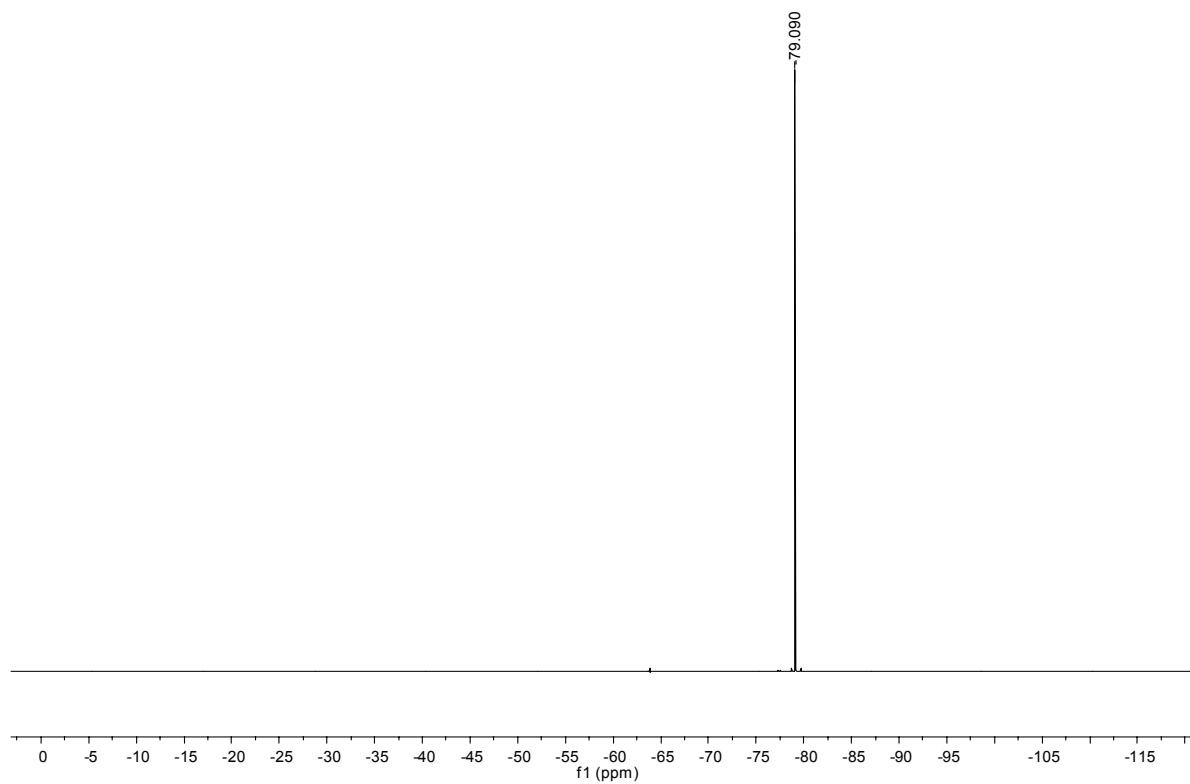

*rac*-4 ( $^1\text{H}$ ):

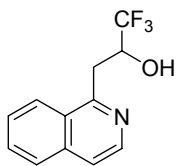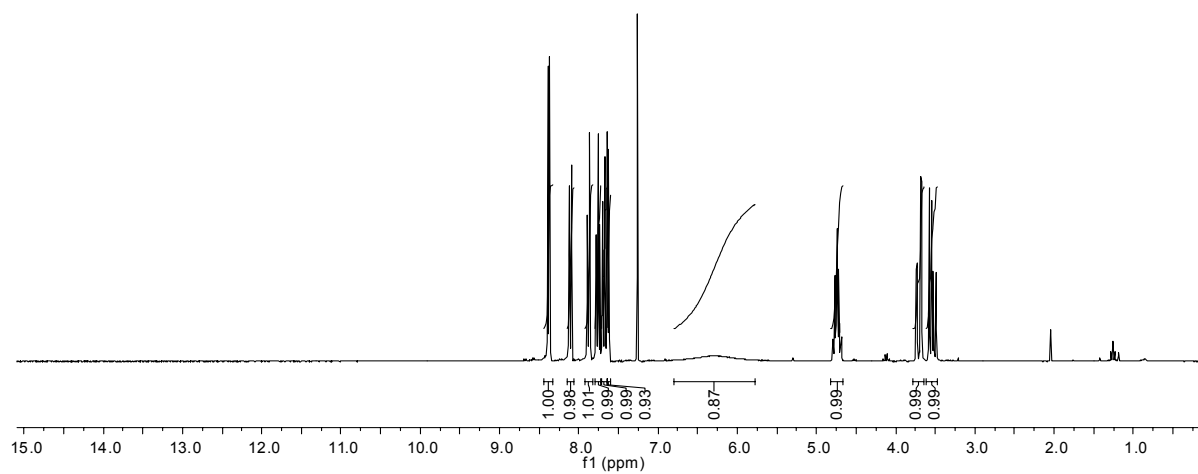

*rac*-4 ( $^{13}\text{C}$ ):

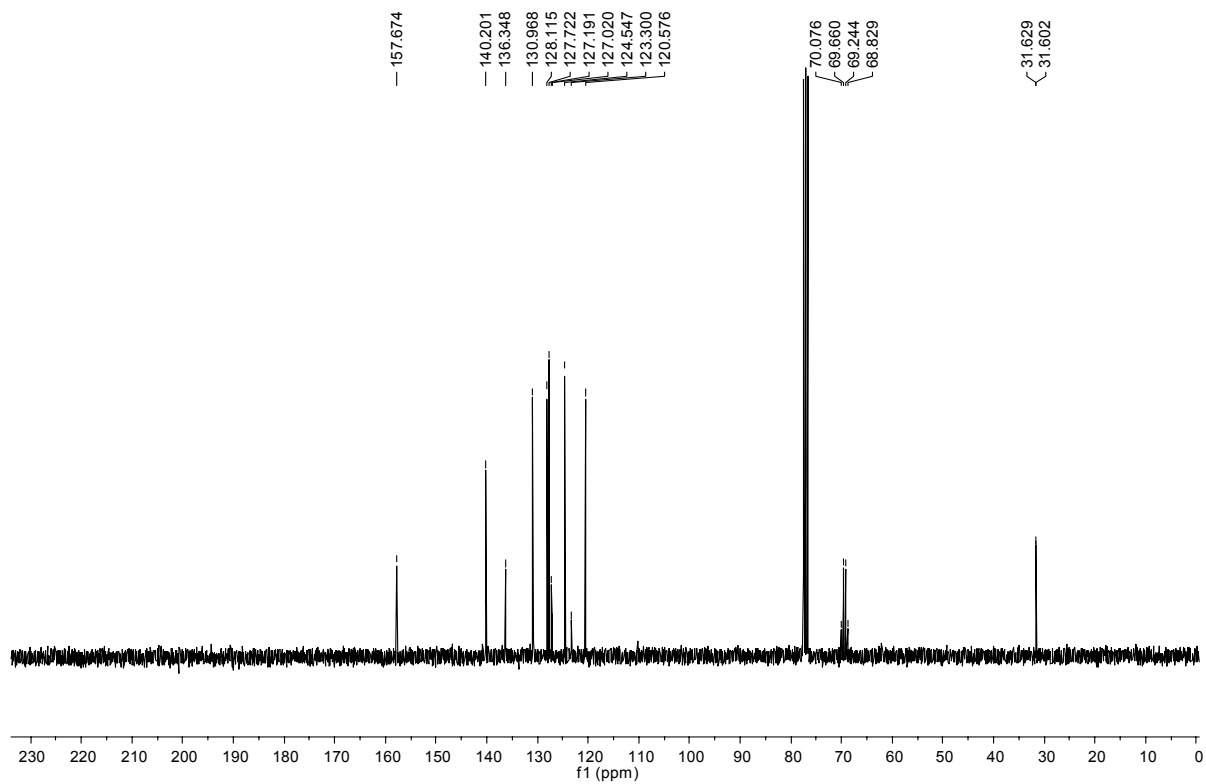

*rac-4* ( $^{19}\text{F}$ ):

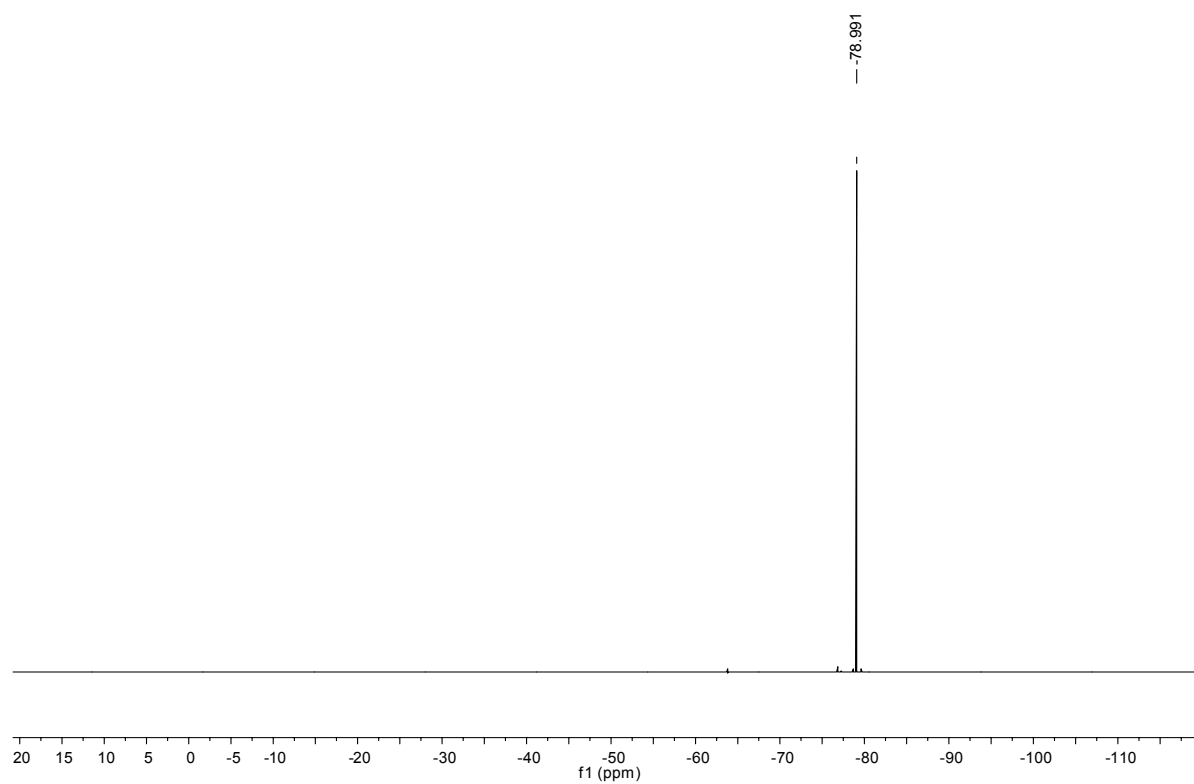

*rac-5* ( $^1\text{H}$ ):

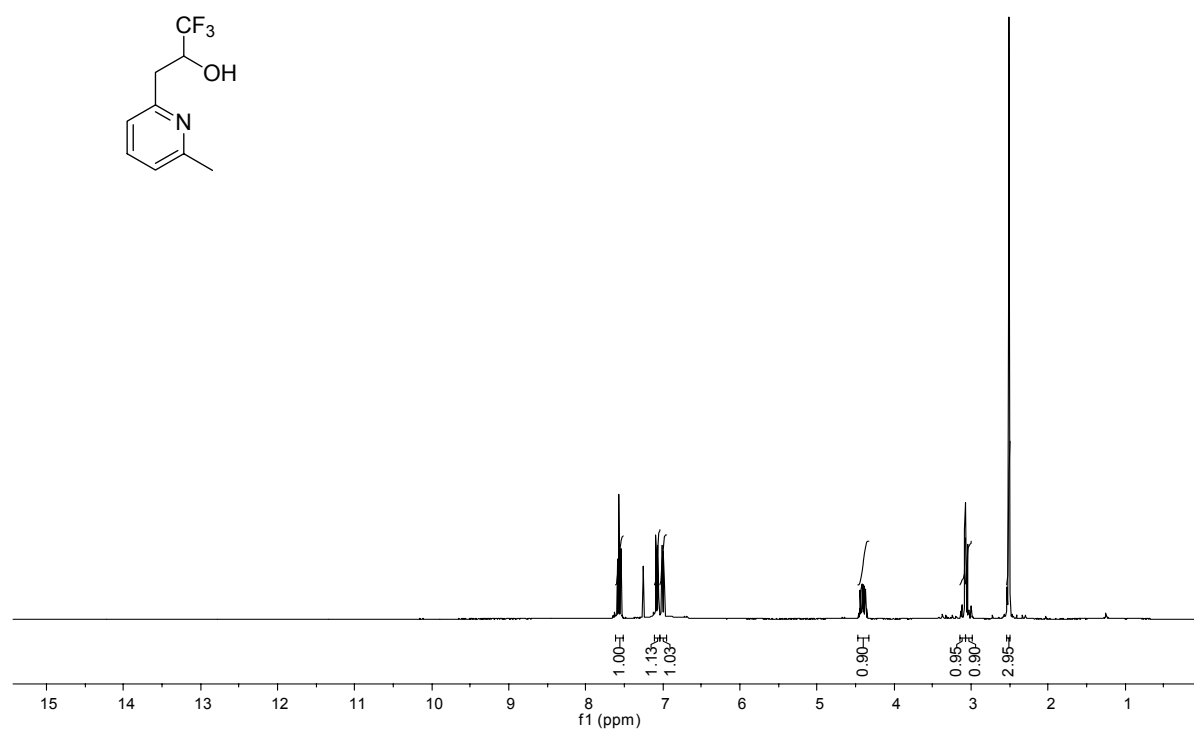

*rac*-**5** ( $^{13}\text{C}$ ):

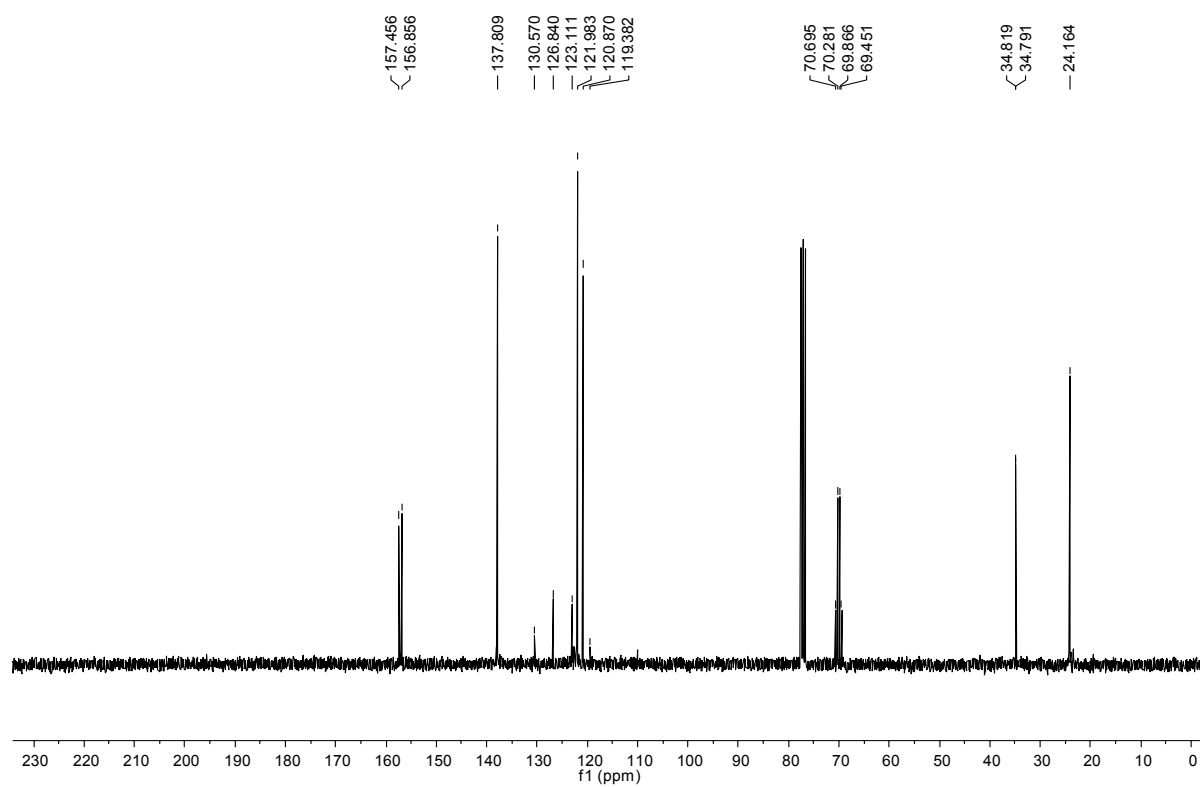

*rac*-**5** ( $^{19}\text{F}$ ):

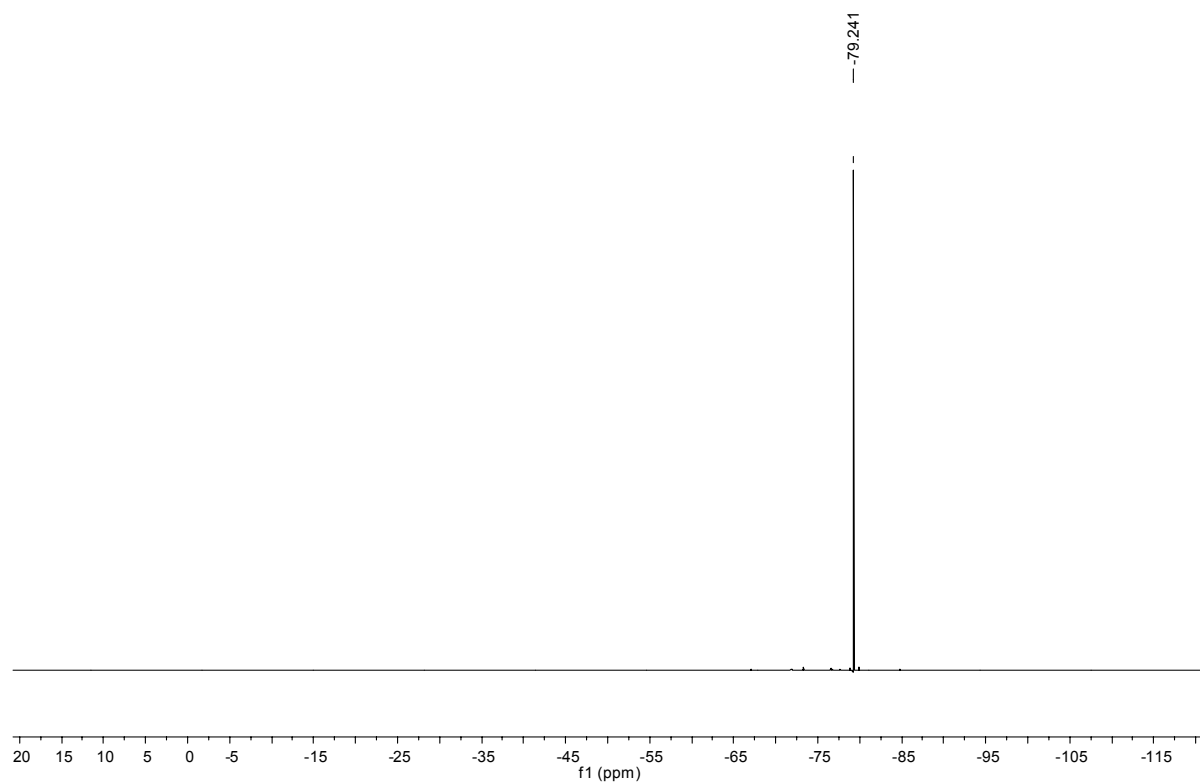

*rac*-6 ( $^1\text{H}$ ):

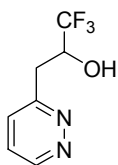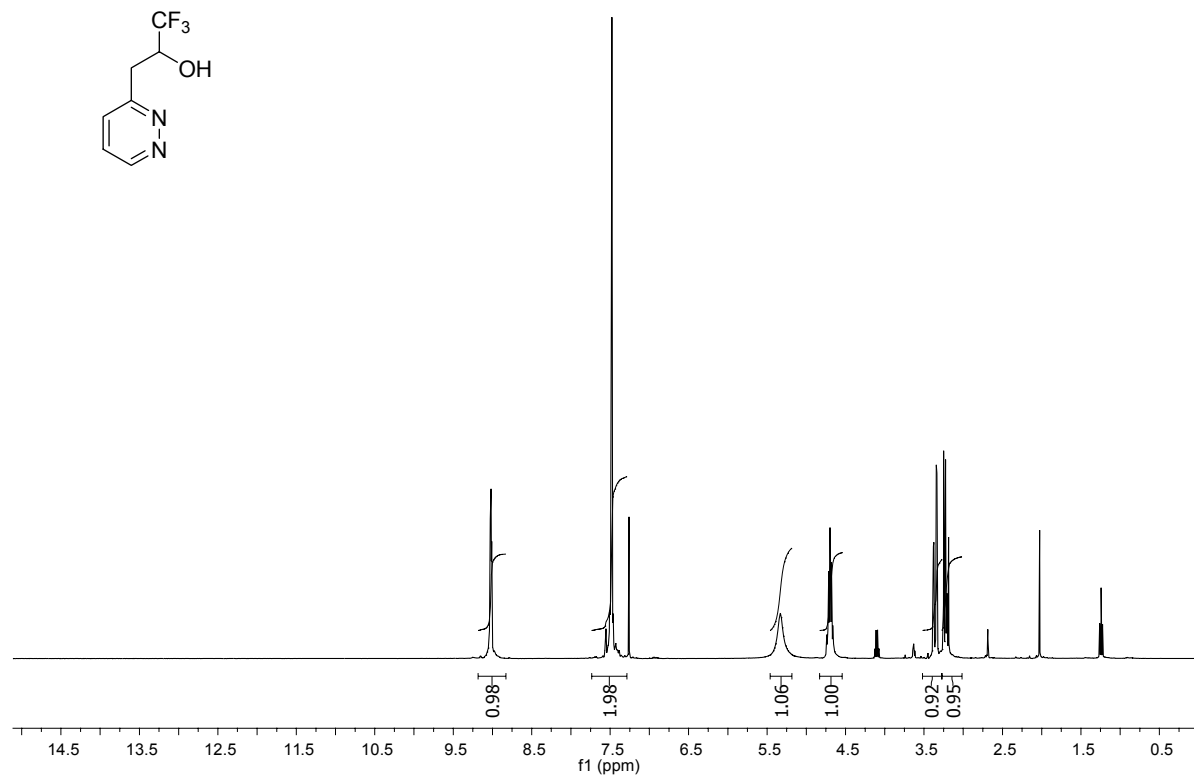

*rac*-6 ( $^{13}\text{C}$ ):

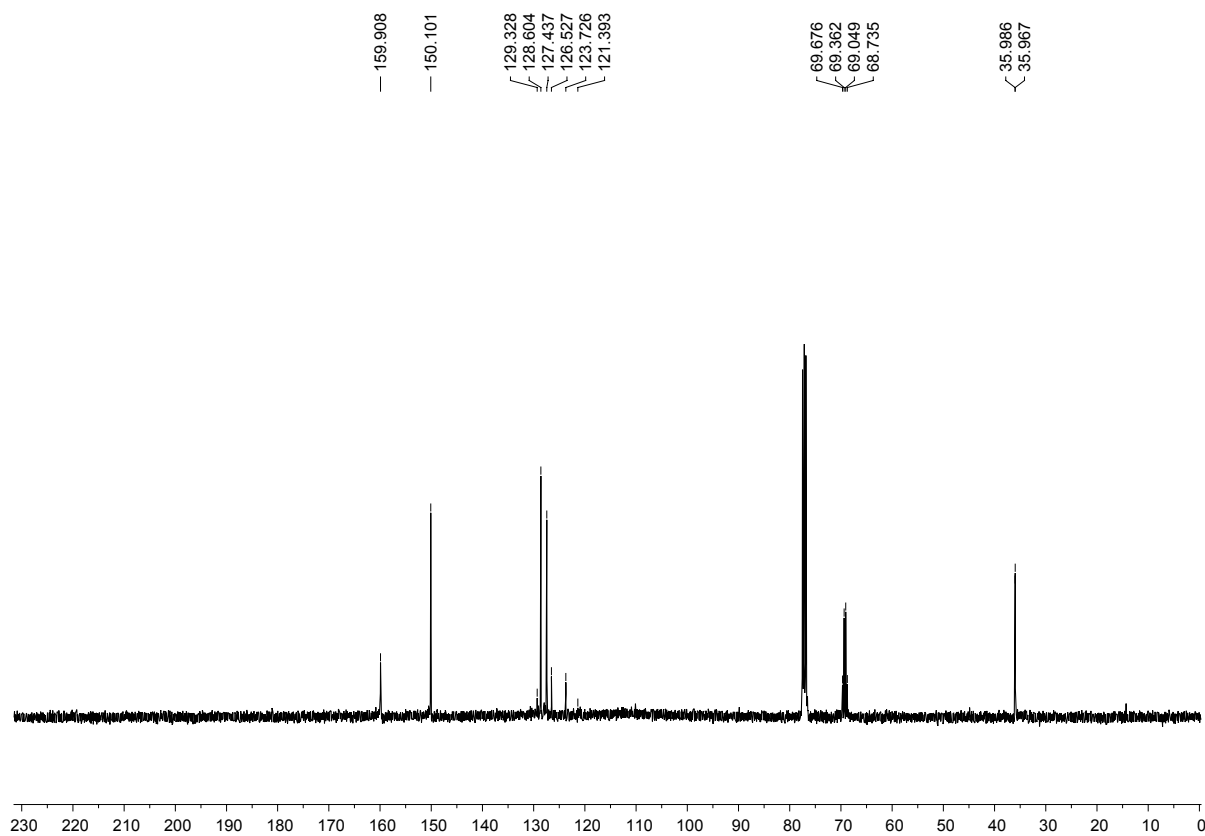

*rac-6* ( $^{19}\text{F}$ ):

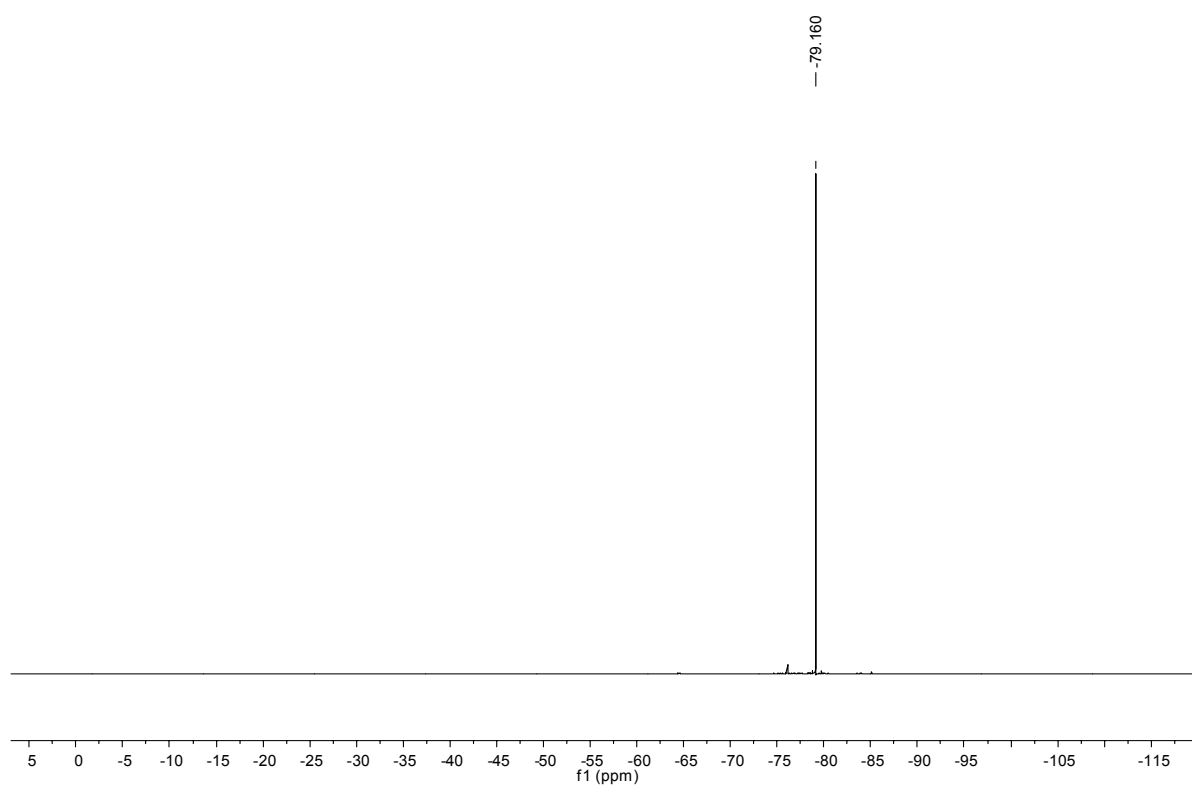

*rac-7* ( $^1\text{H}$ ):

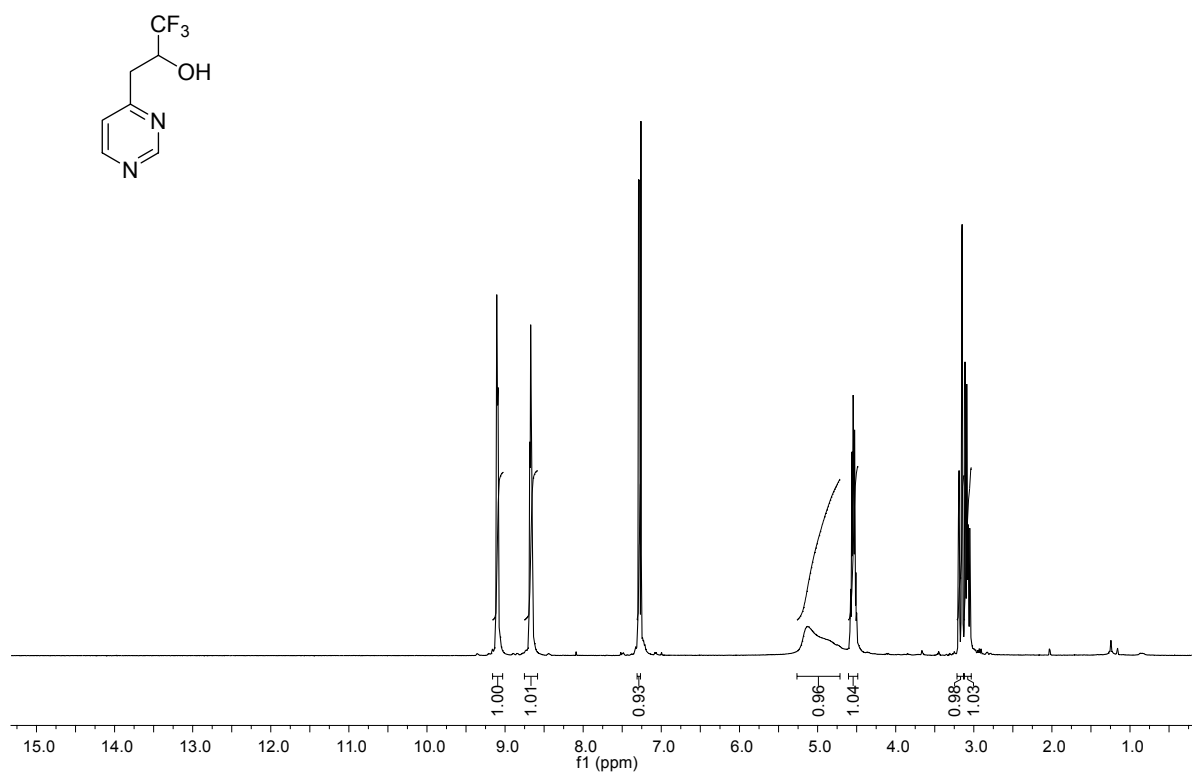

*rac-7* ( $^{13}\text{C}$ ):

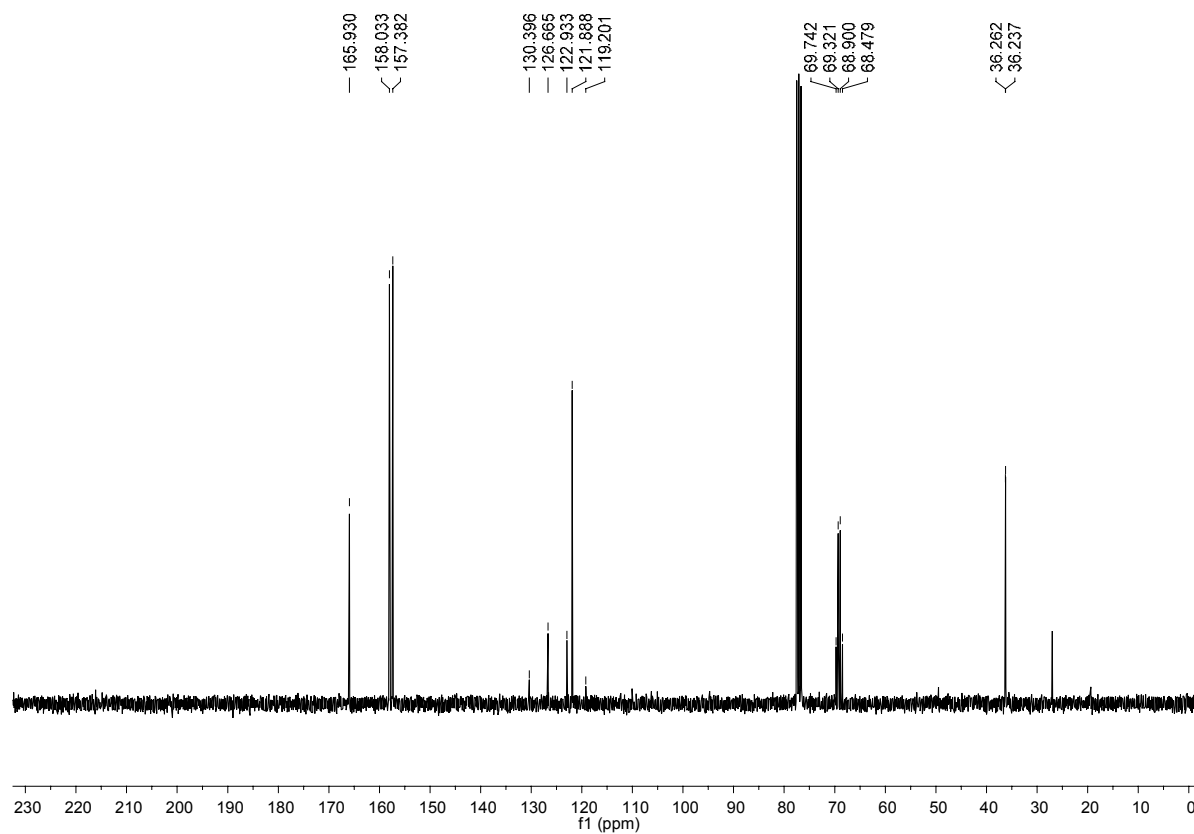

*rac-7* ( $^{19}\text{F}$ ):

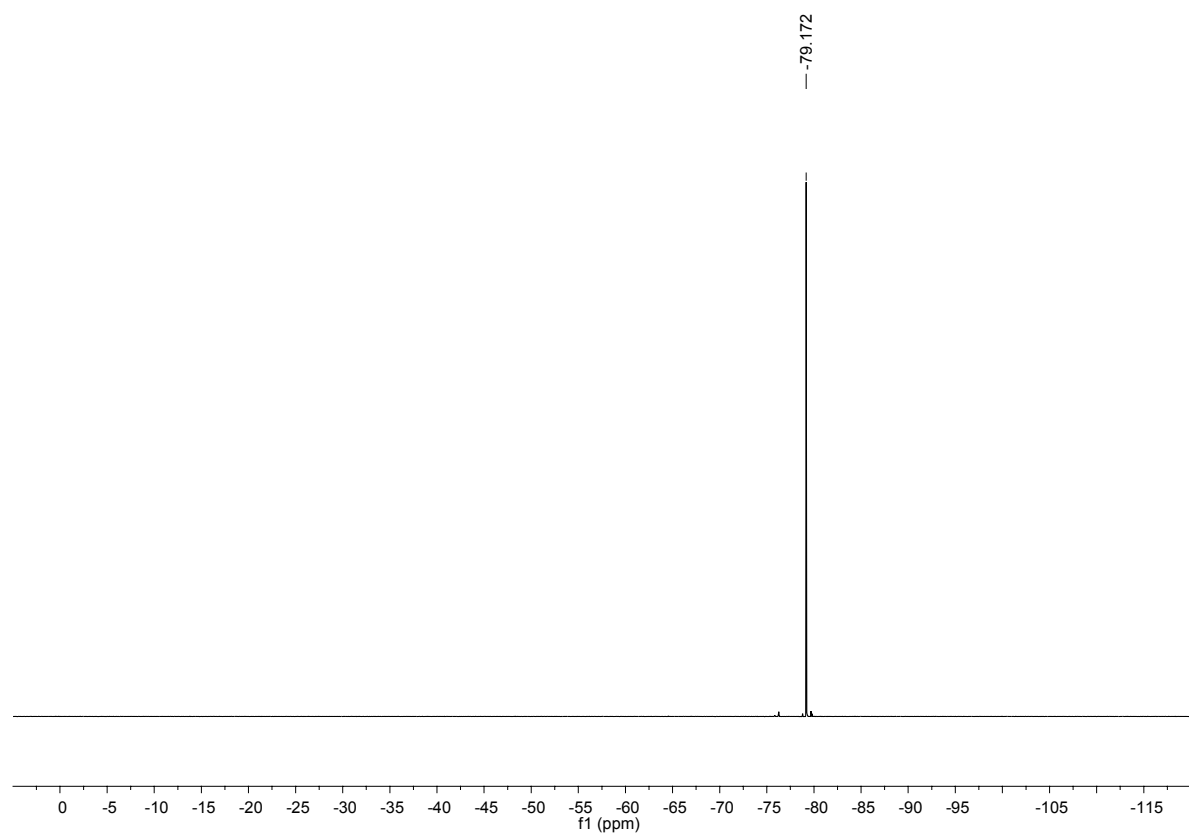



*rac-8* ( $^1\text{H}$ ):

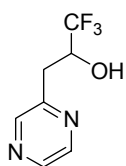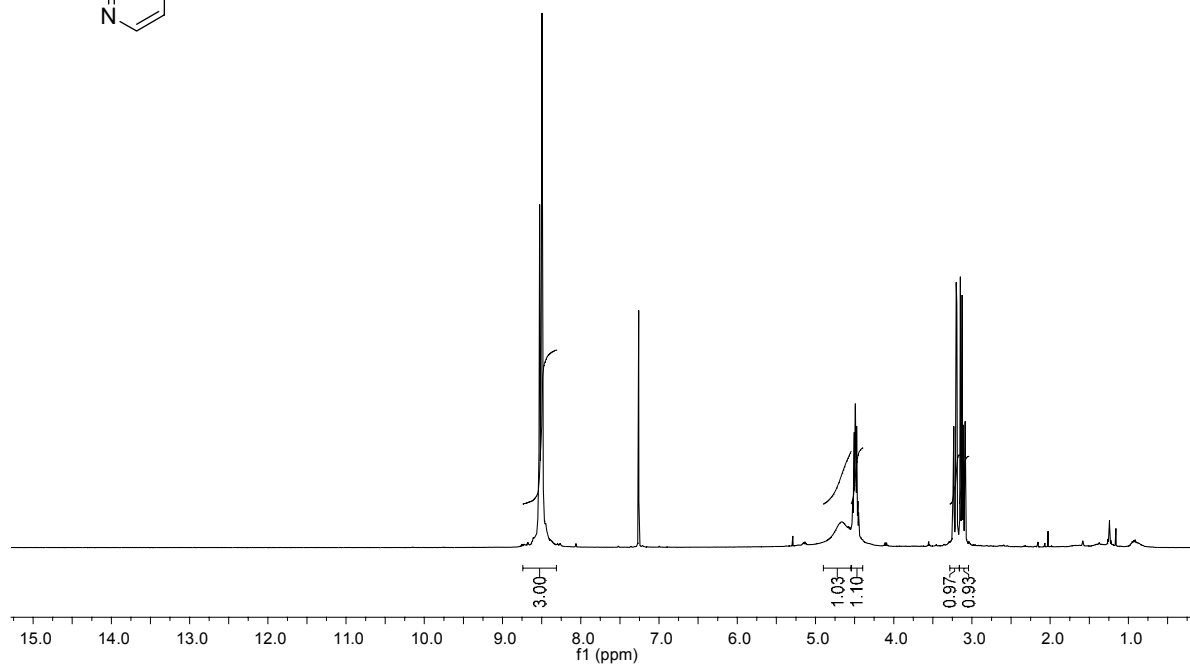

*rac-8* ( $^{13}\text{C}$ ):

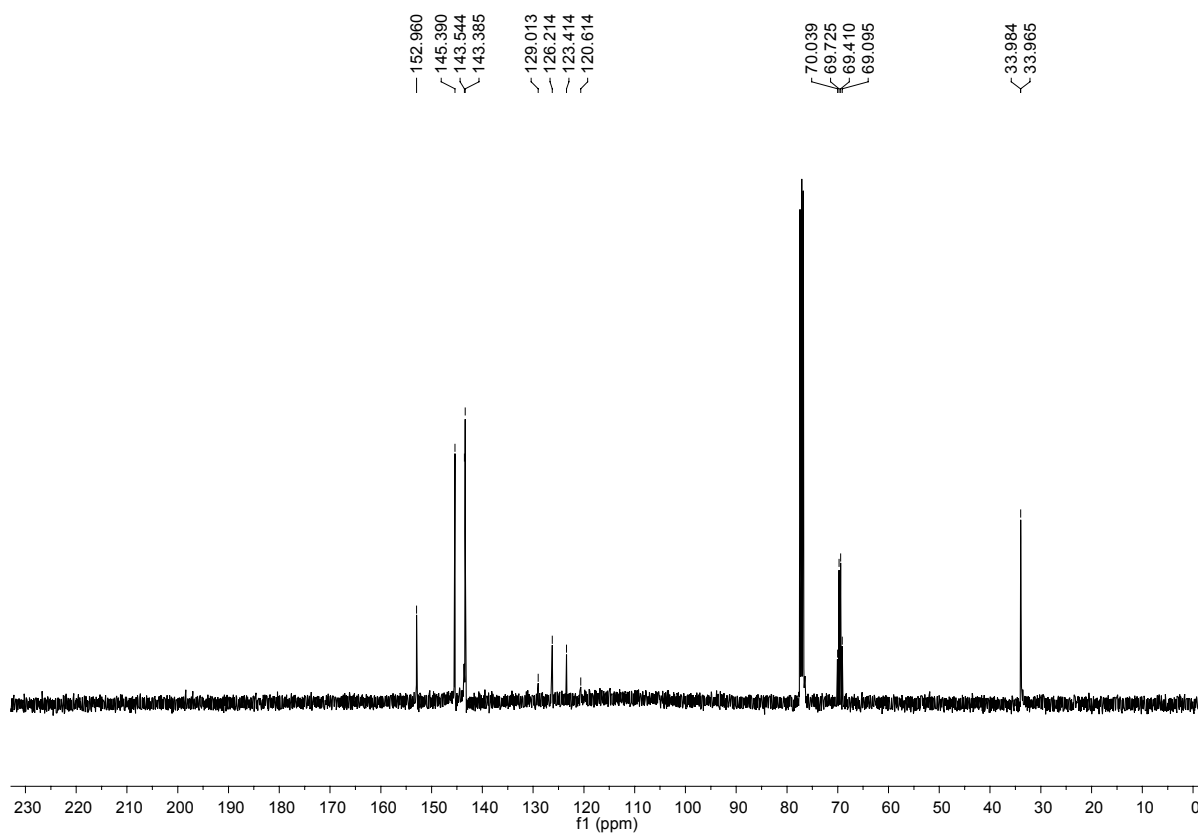

*rac-8* ( $^{19}\text{F}$ ):

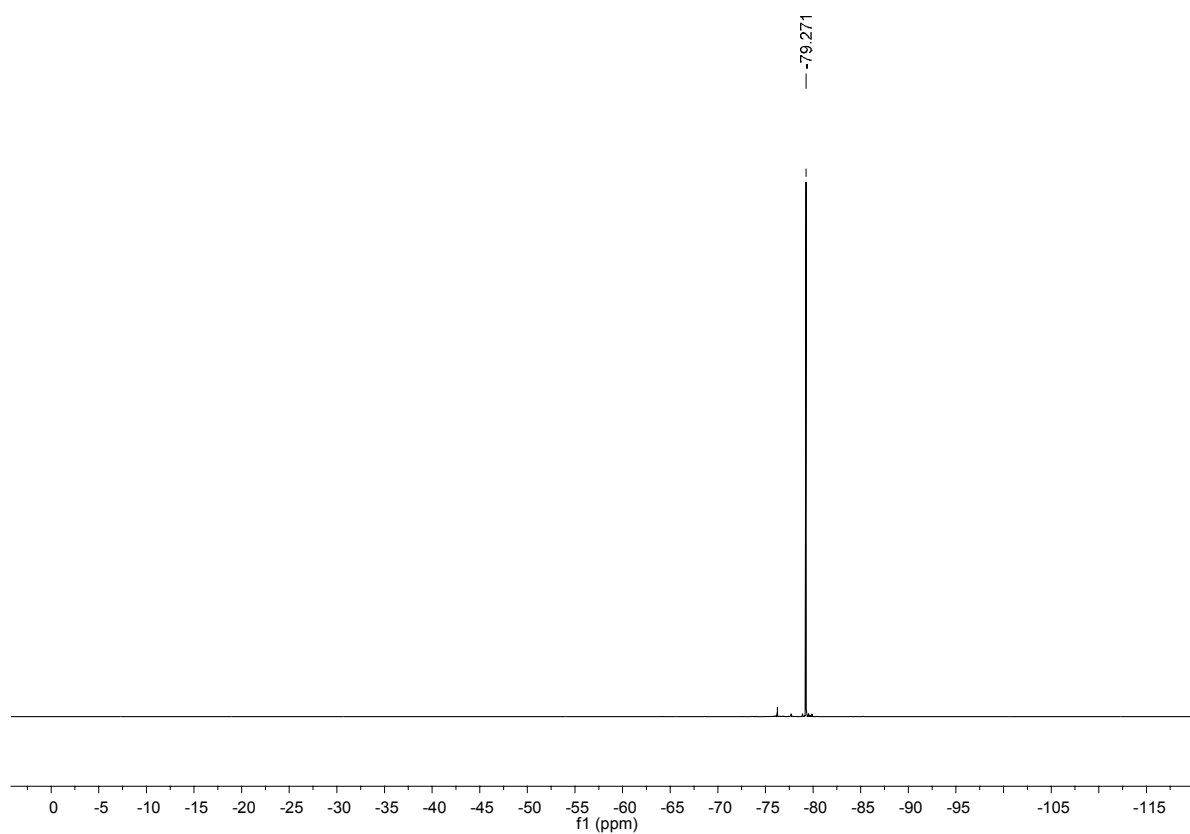

*rac-9* ( $^1\text{H}$ ):

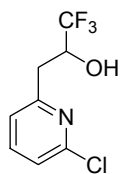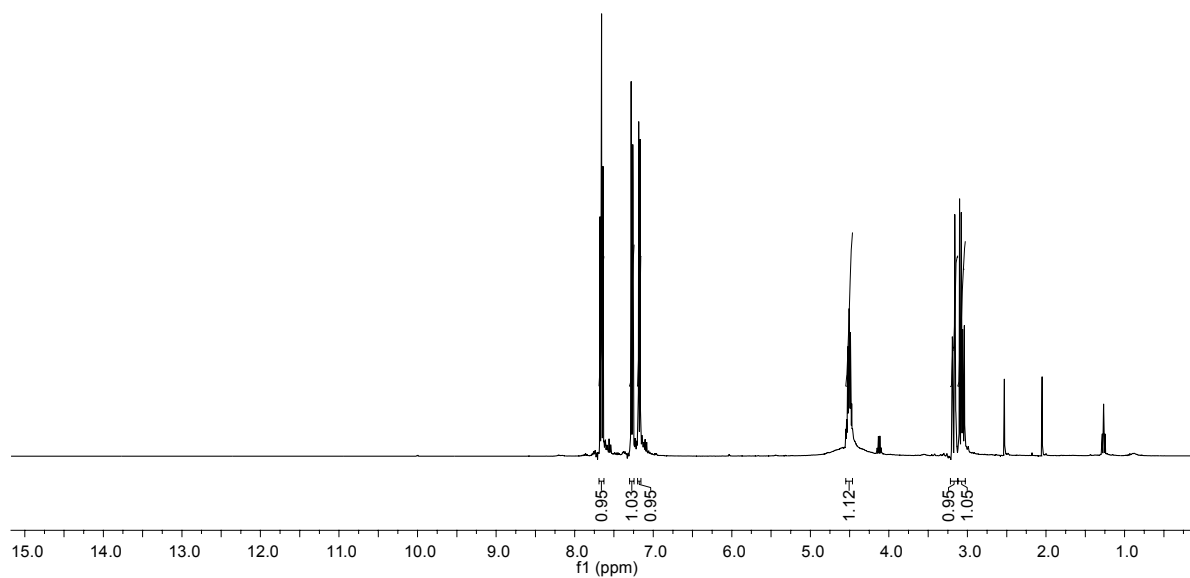

*rac-9* ( $^{13}\text{C}$ ):

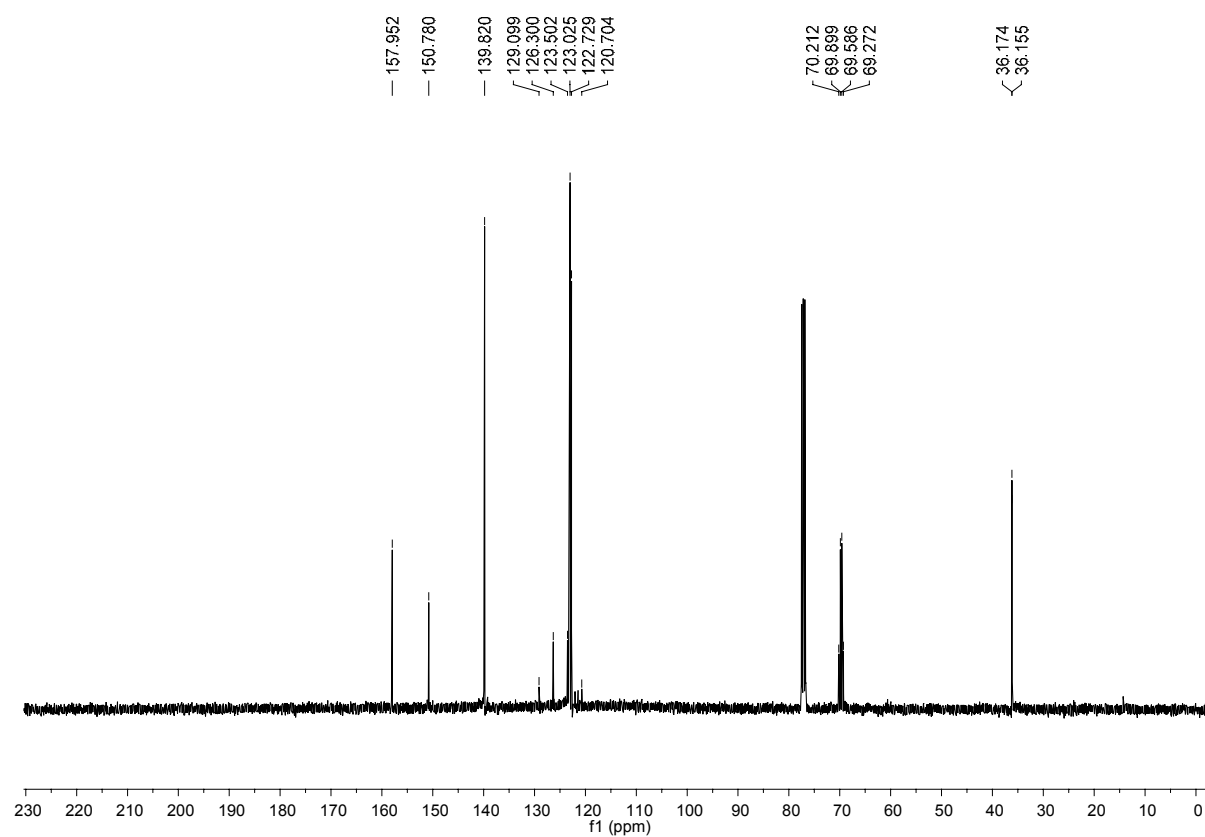

*rac-9* ( $^{19}\text{F}$ ):

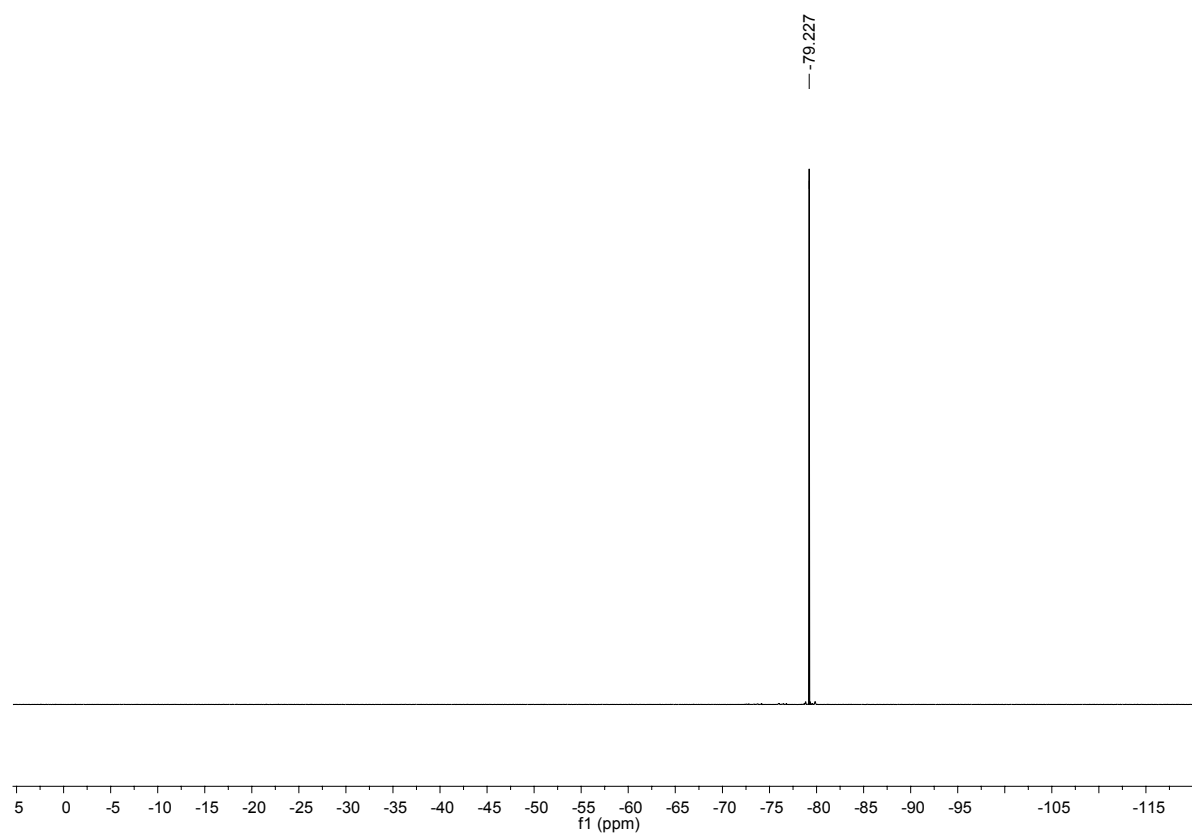

*rac*-**10** ( $^1\text{H}$ ):

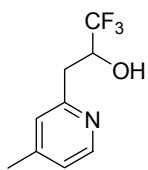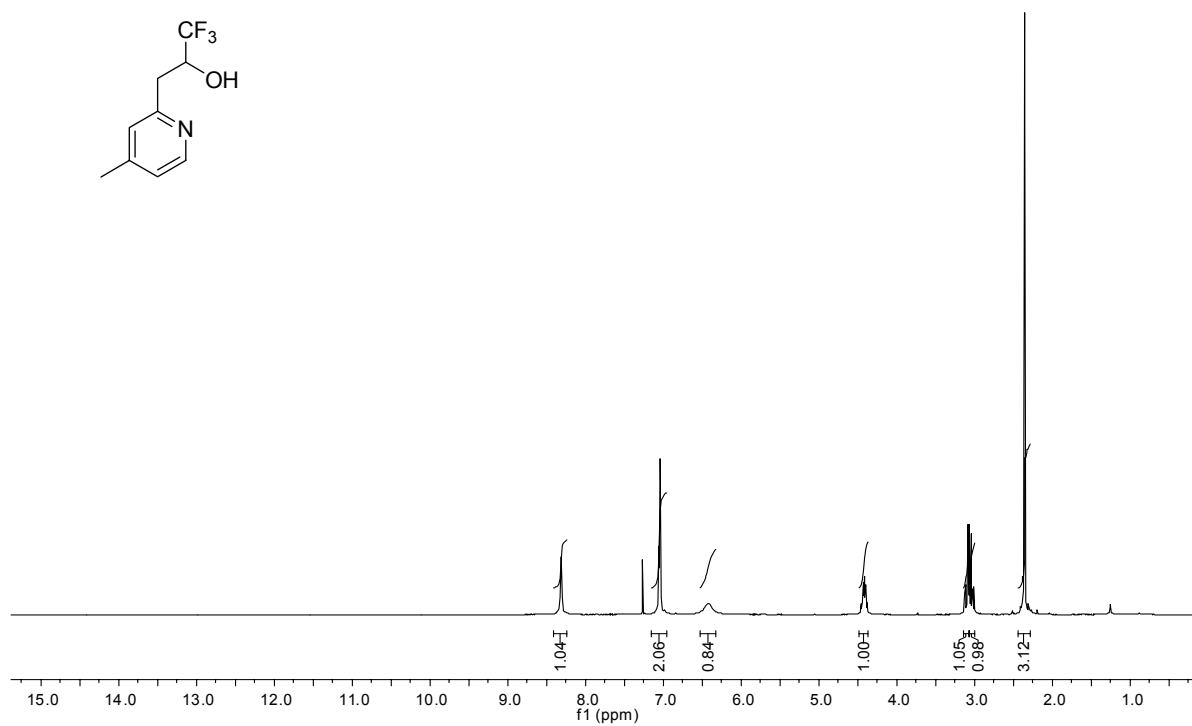

*rac*-**10** ( $^{13}\text{C}$ ):

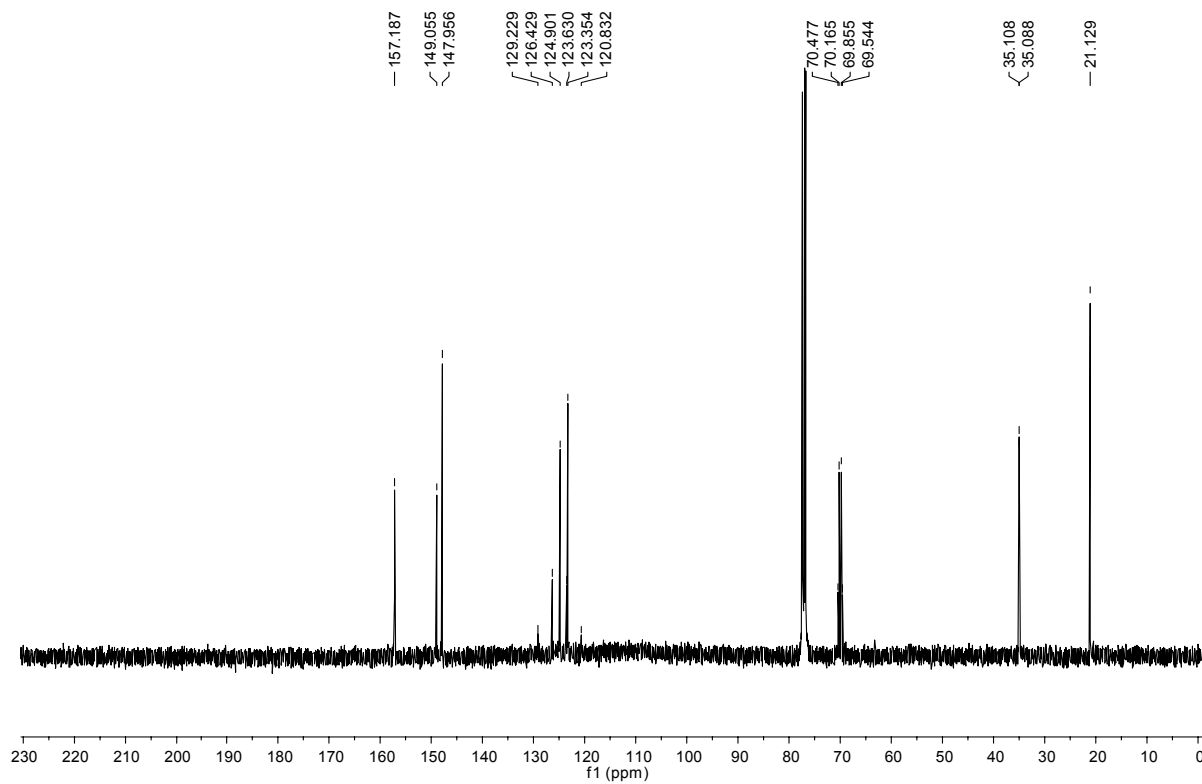

*rac*-**10** ( $^{19}\text{F}$ ):

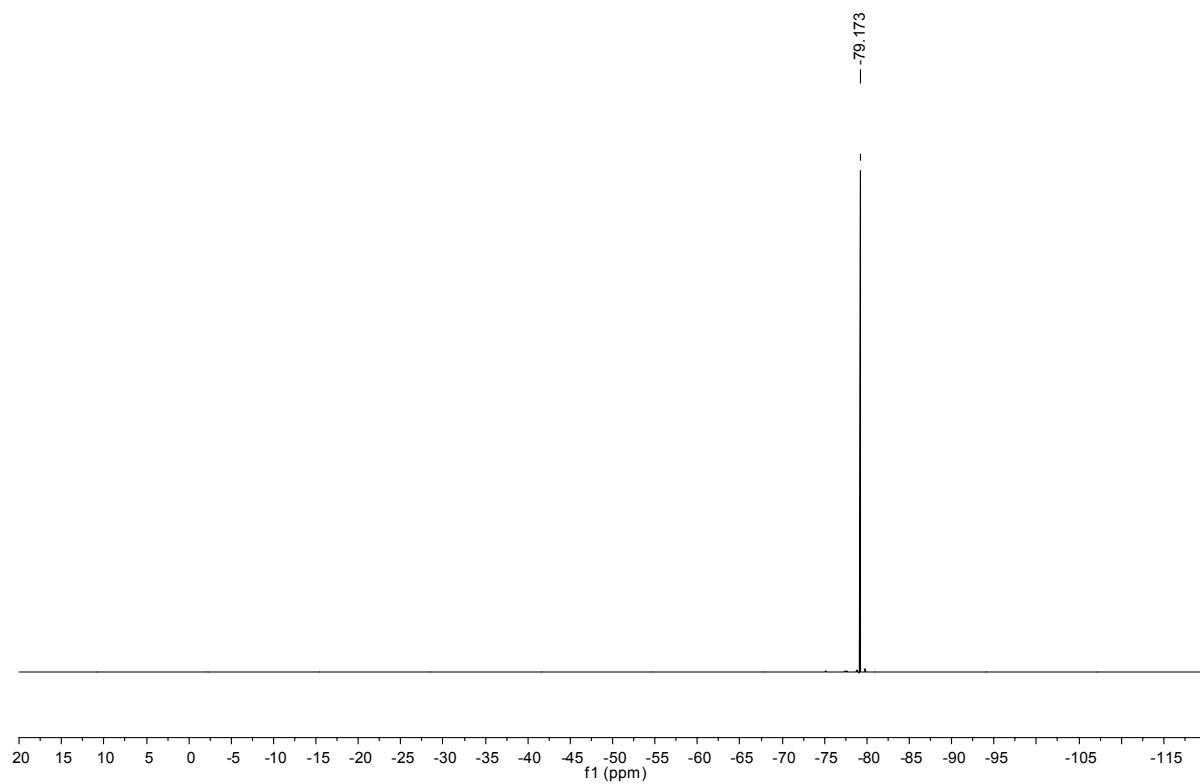

( $^{\text{Si}}$ *R*\*,*R*\*)-**11** ( $^1\text{H}$ ):

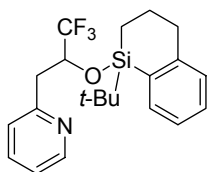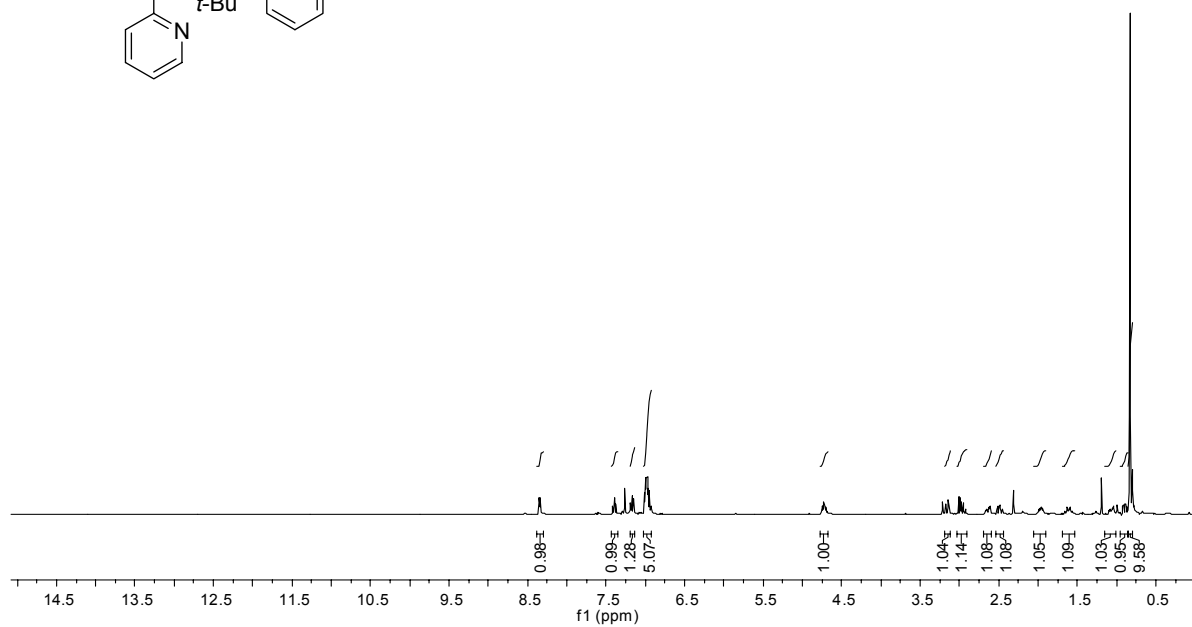

$(^{Si}R^*,R^*)\text{-11}$  ( $^{13}\text{C}$ ):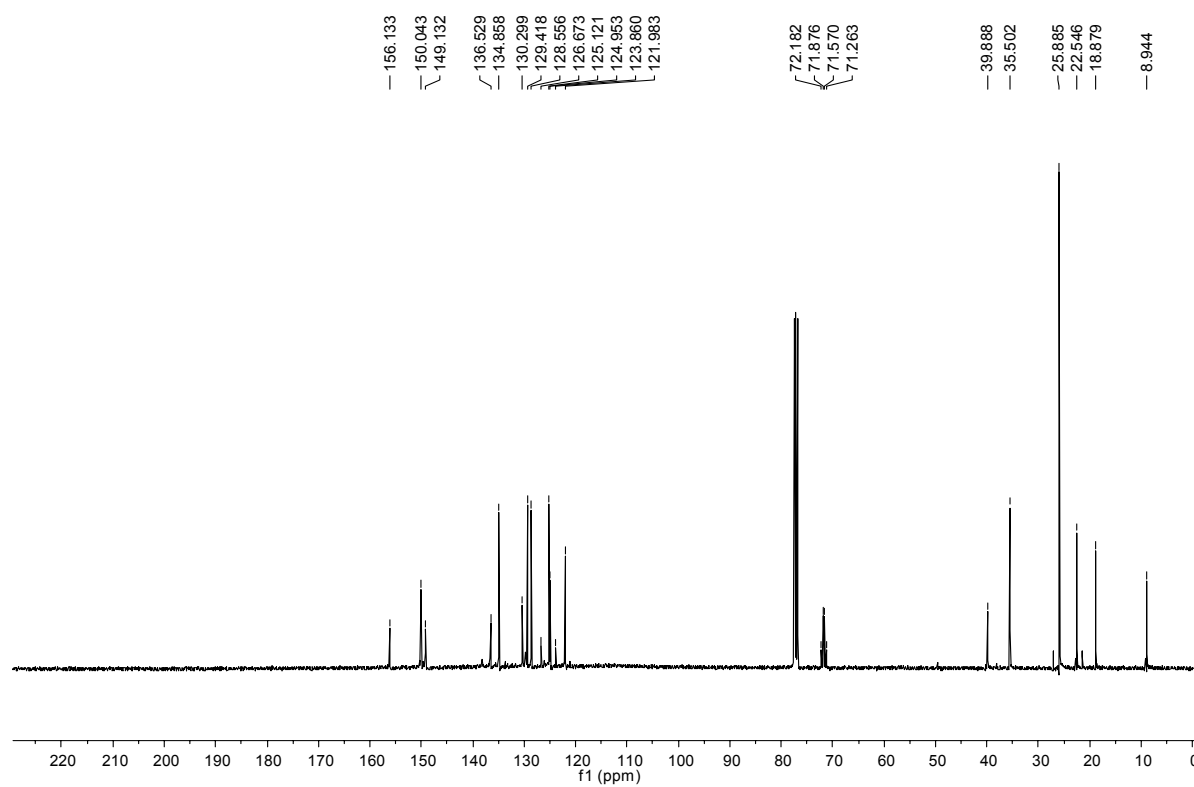 $(^{Si}R^*,R^*)\text{-11}$  ( $^{19}\text{F}$ ):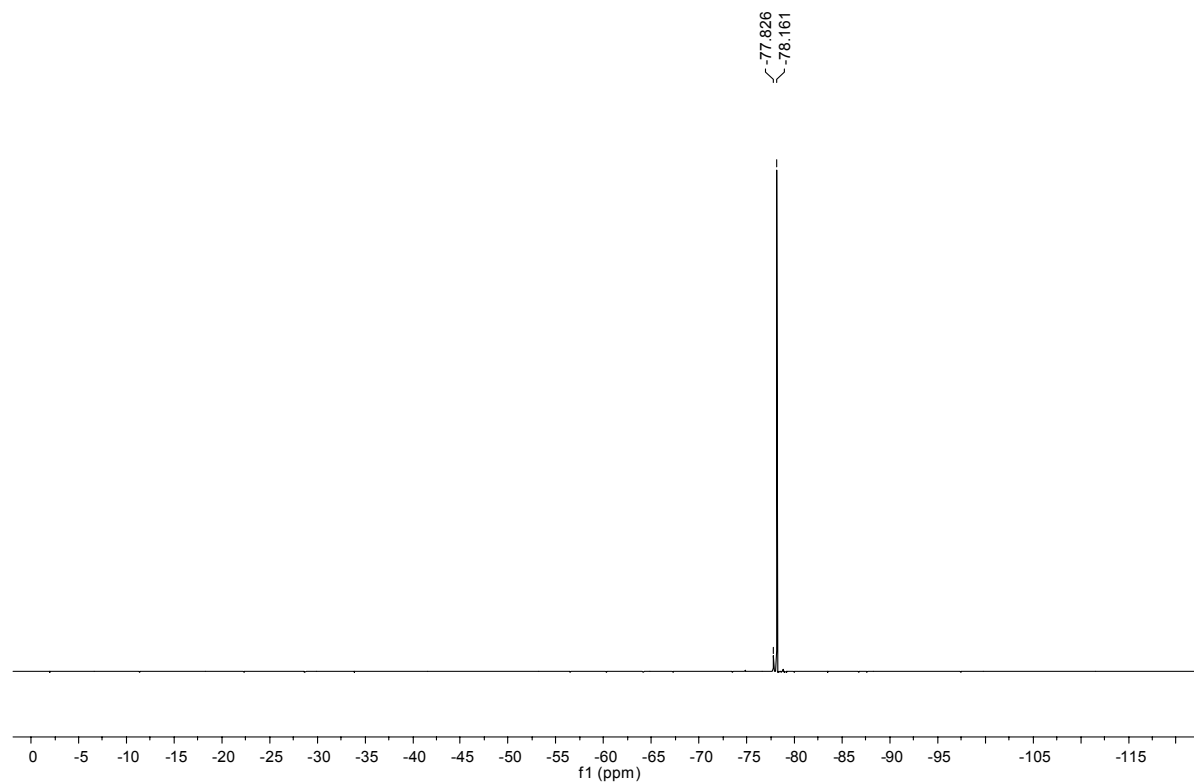

(<sup>Si</sup>R\*,R\*)-12 (<sup>1</sup>H):

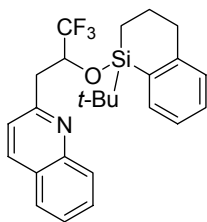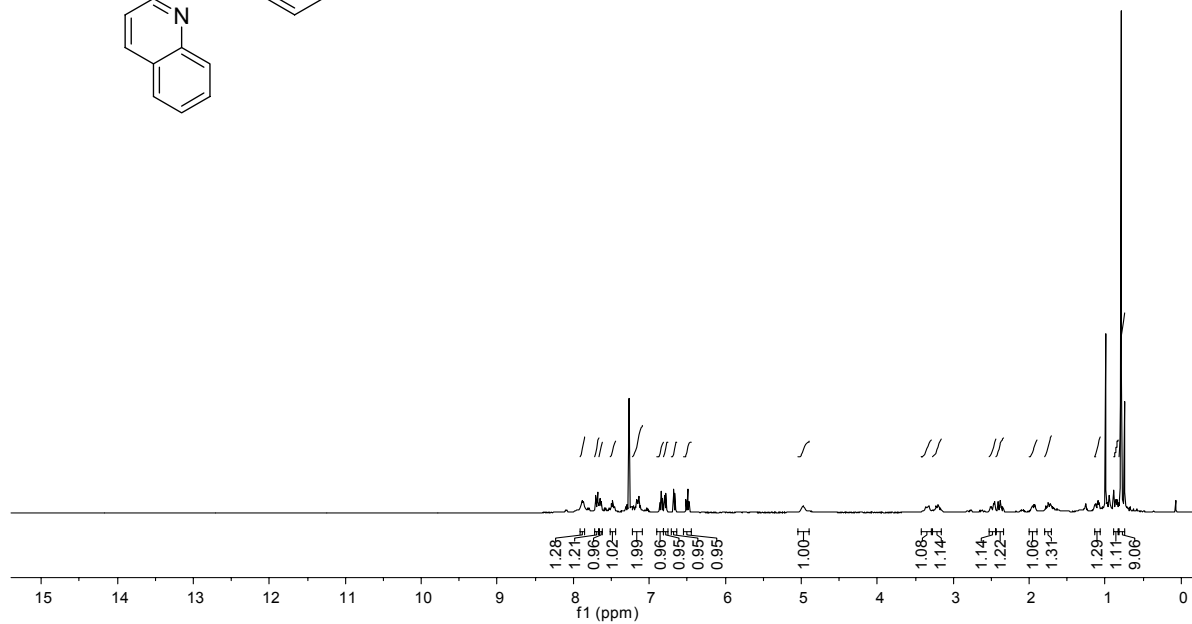

(<sup>Si</sup>R\*,R\*)-12 (<sup>13</sup>C):

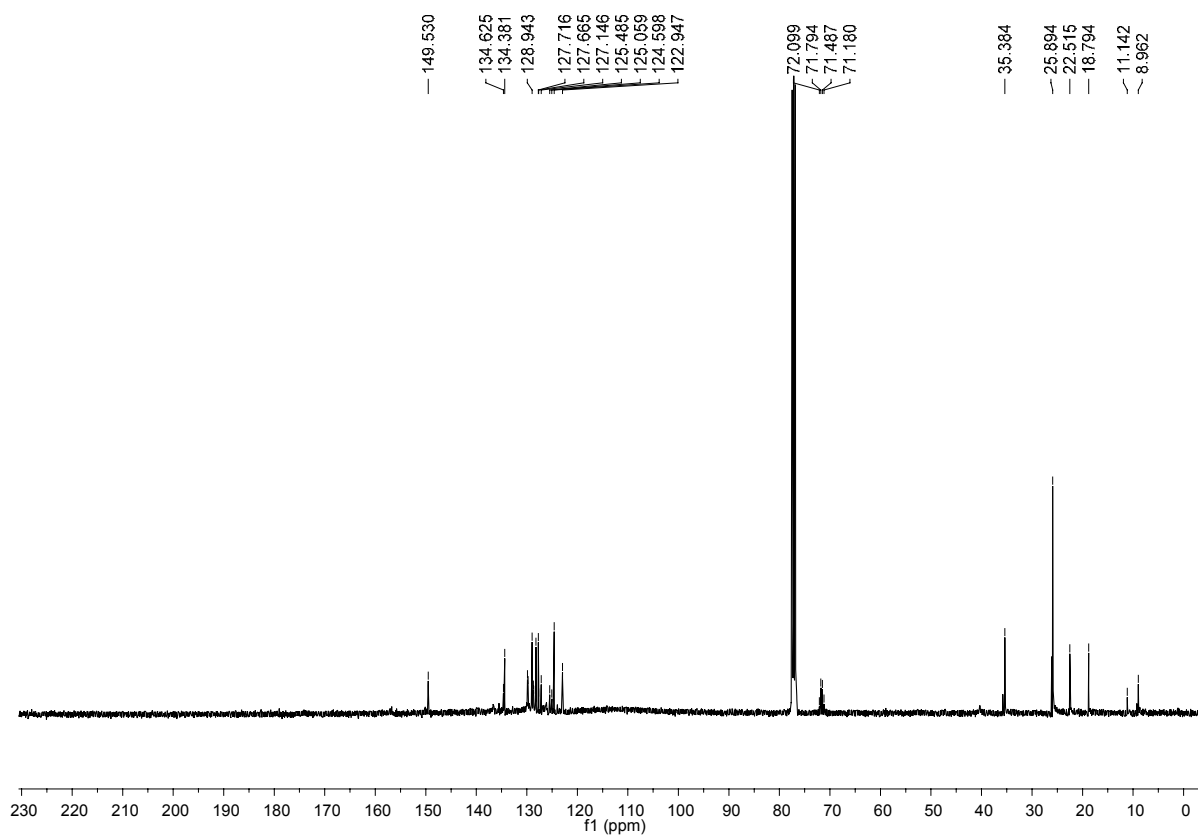

$(^{Si}R^*,R^*)\text{-12}$  ( $^{19}\text{F}$ ):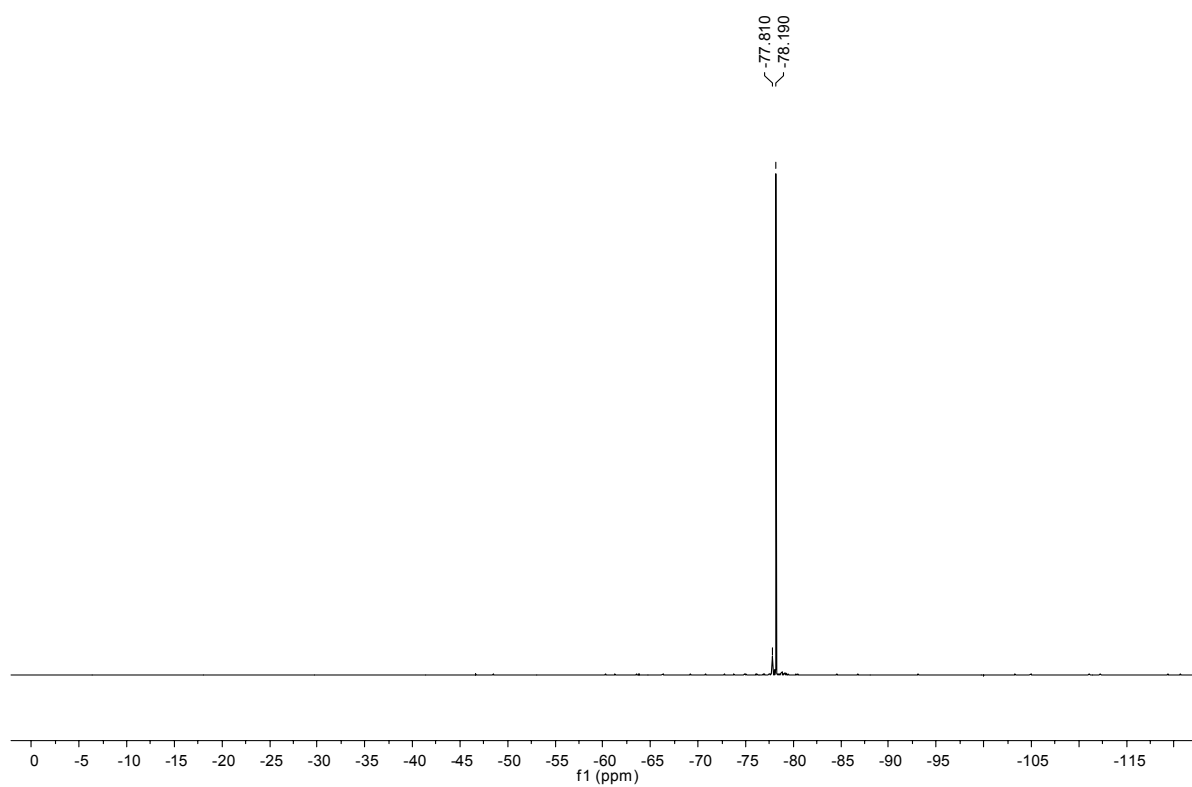 $(^{Si}R^*,R^*)\text{-13}$  ( $^1\text{H}$ ):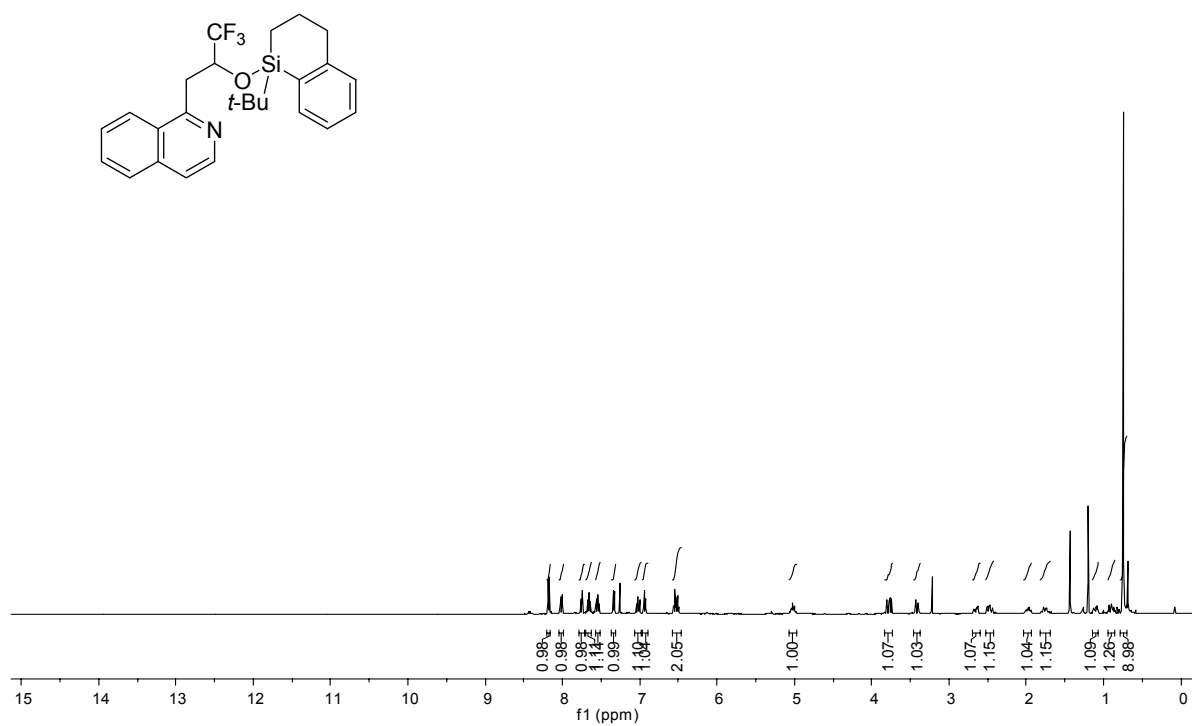



$(^{Si}R^*,R^*)\text{-13 } (^{13}\text{C})$ :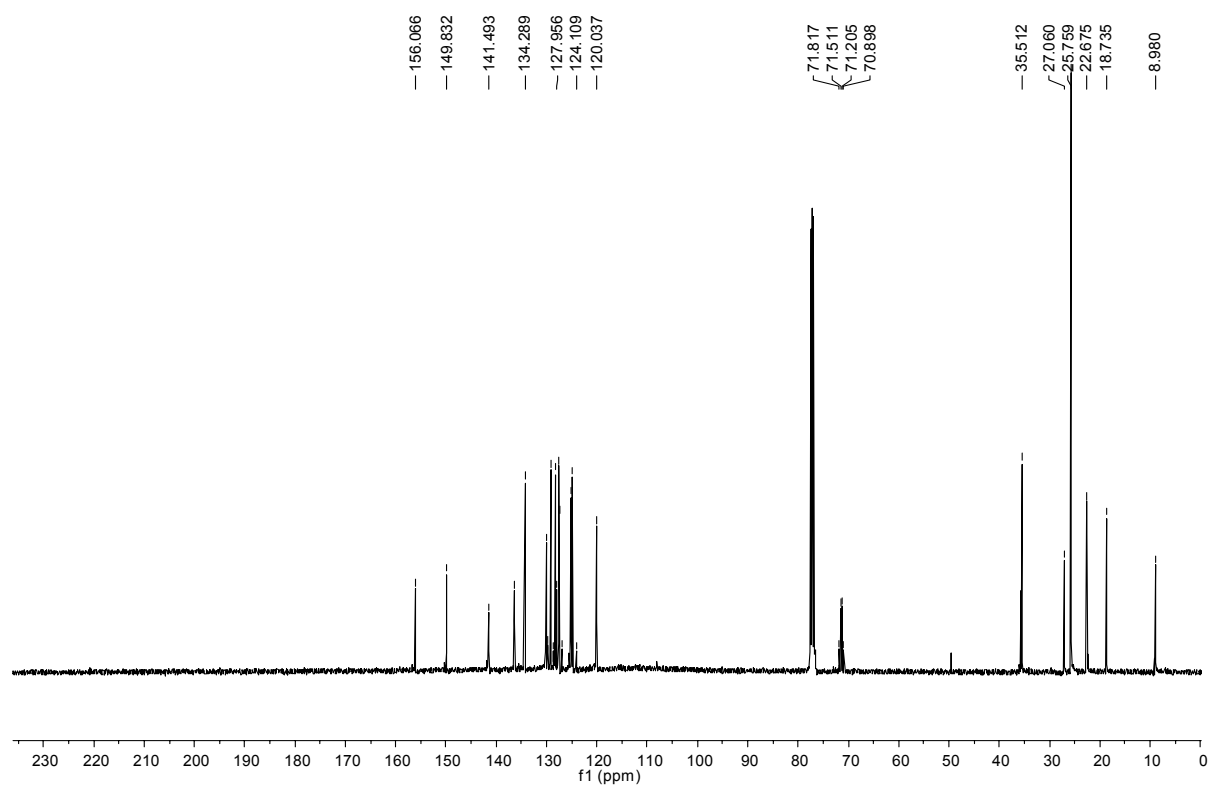 $(^{Si}R^*,R^*)\text{-13 } (^{19}\text{F})$ :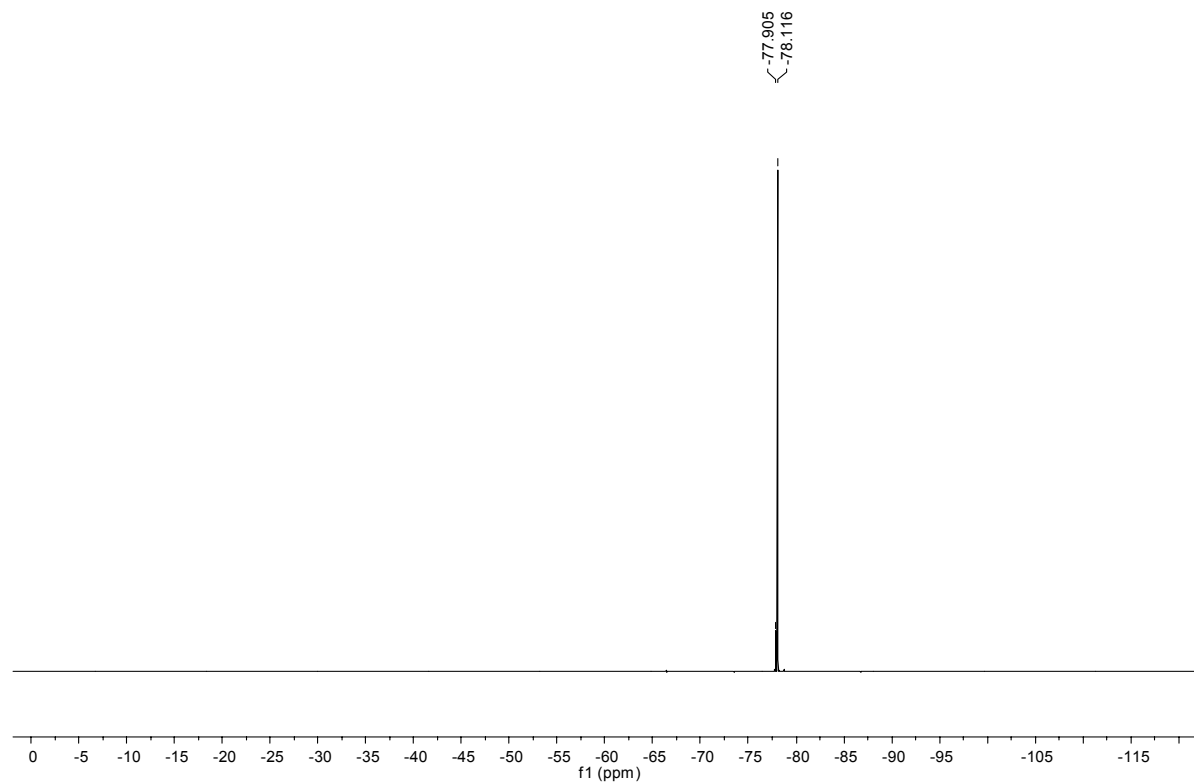

(<sup>Si</sup>R\*,R\*)-14 (<sup>1</sup>H):

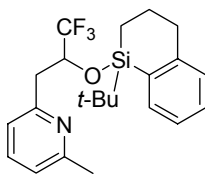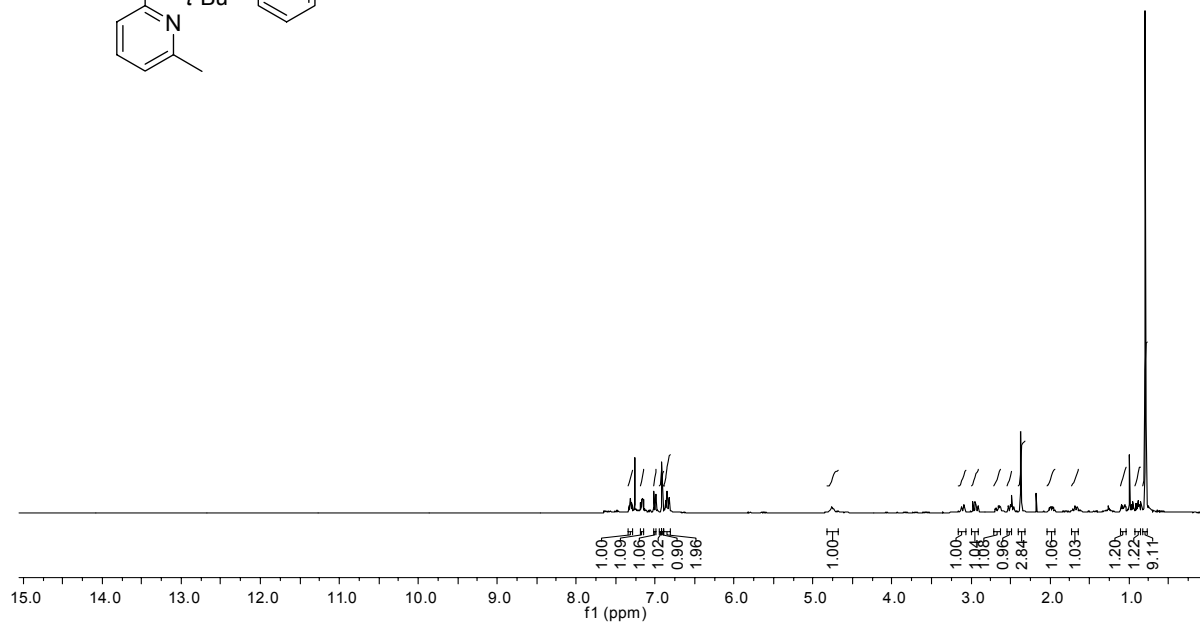

(<sup>Si</sup>R\*,R\*)-14 (<sup>13</sup>C):

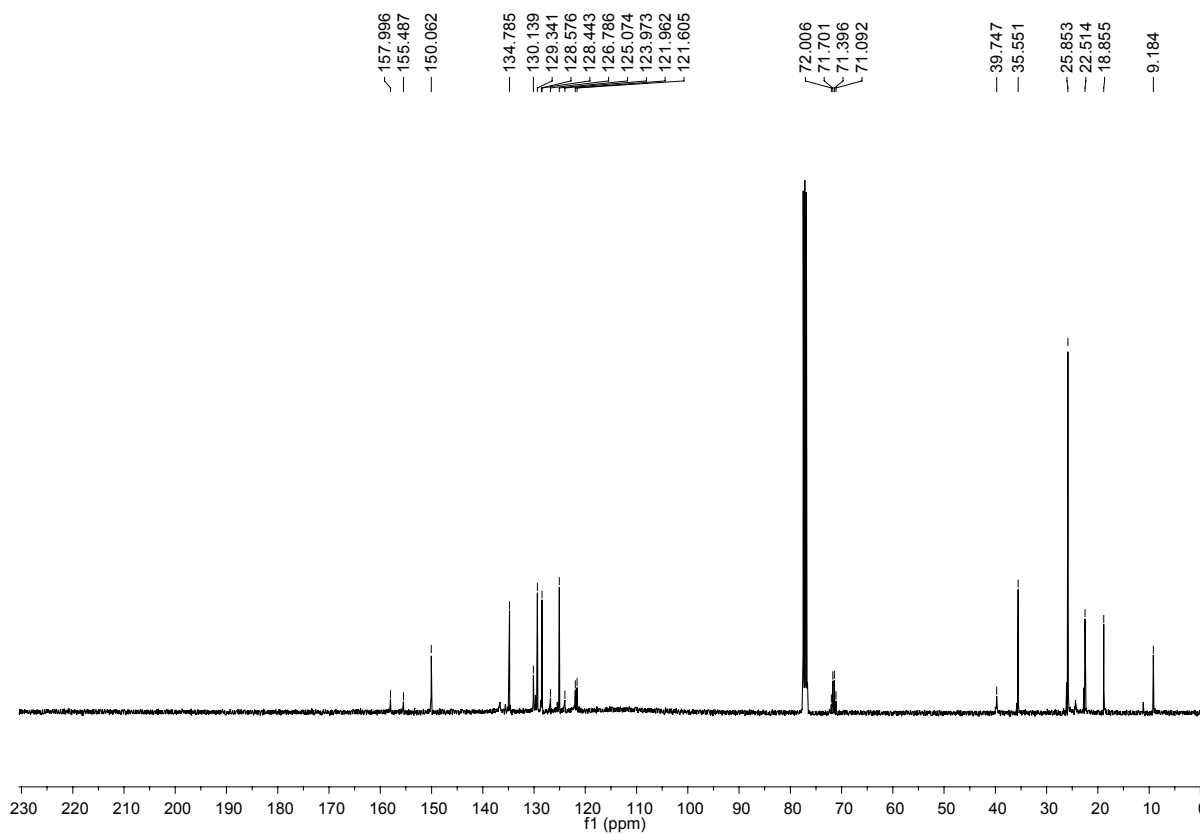

(<sup>Si</sup>R\*,R\*)-14 (<sup>19</sup>F):

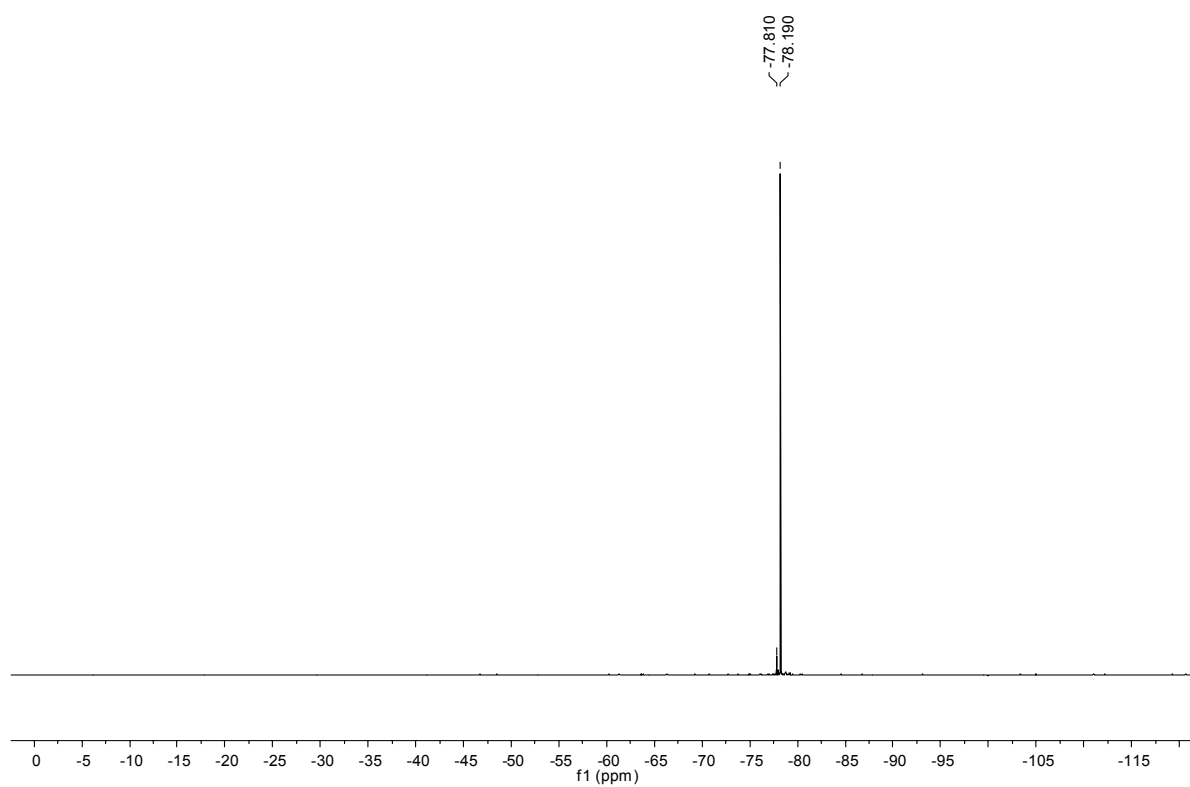

(<sup>Si</sup>R\*,R\*)-15 (<sup>1</sup>H):

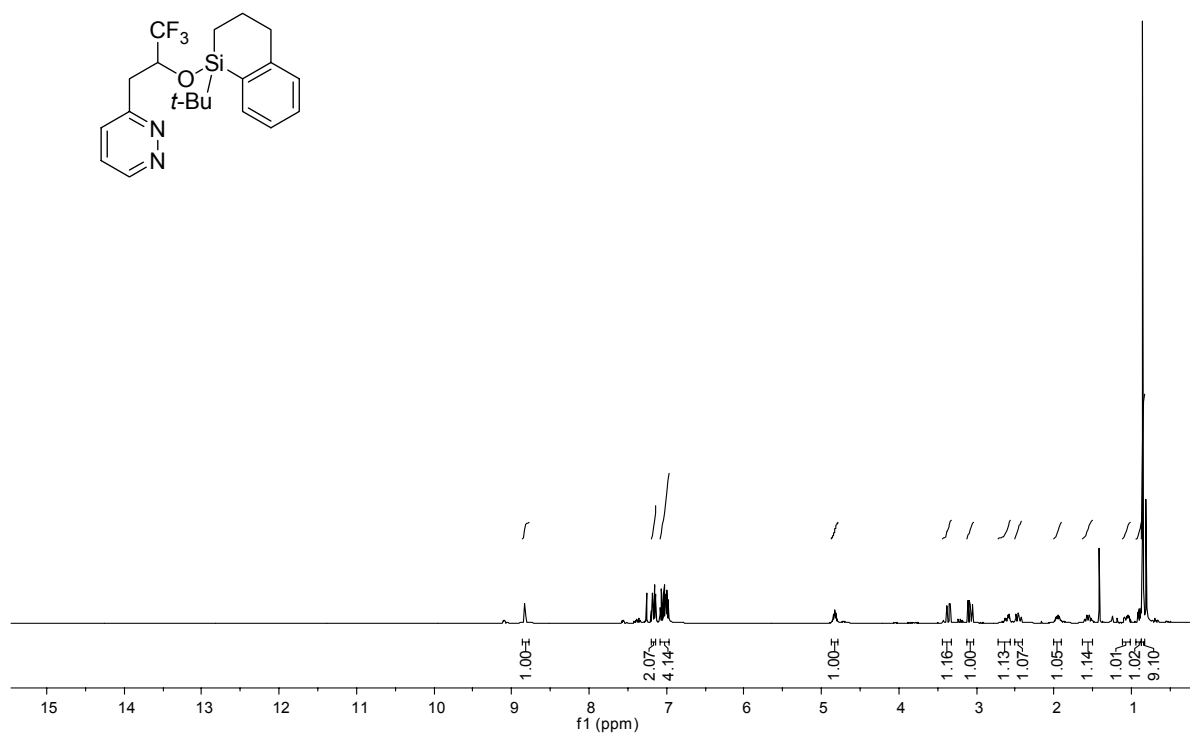

$(^{Si}R^*,R^*)\text{-15}$  ( $^{13}\text{C}$ ):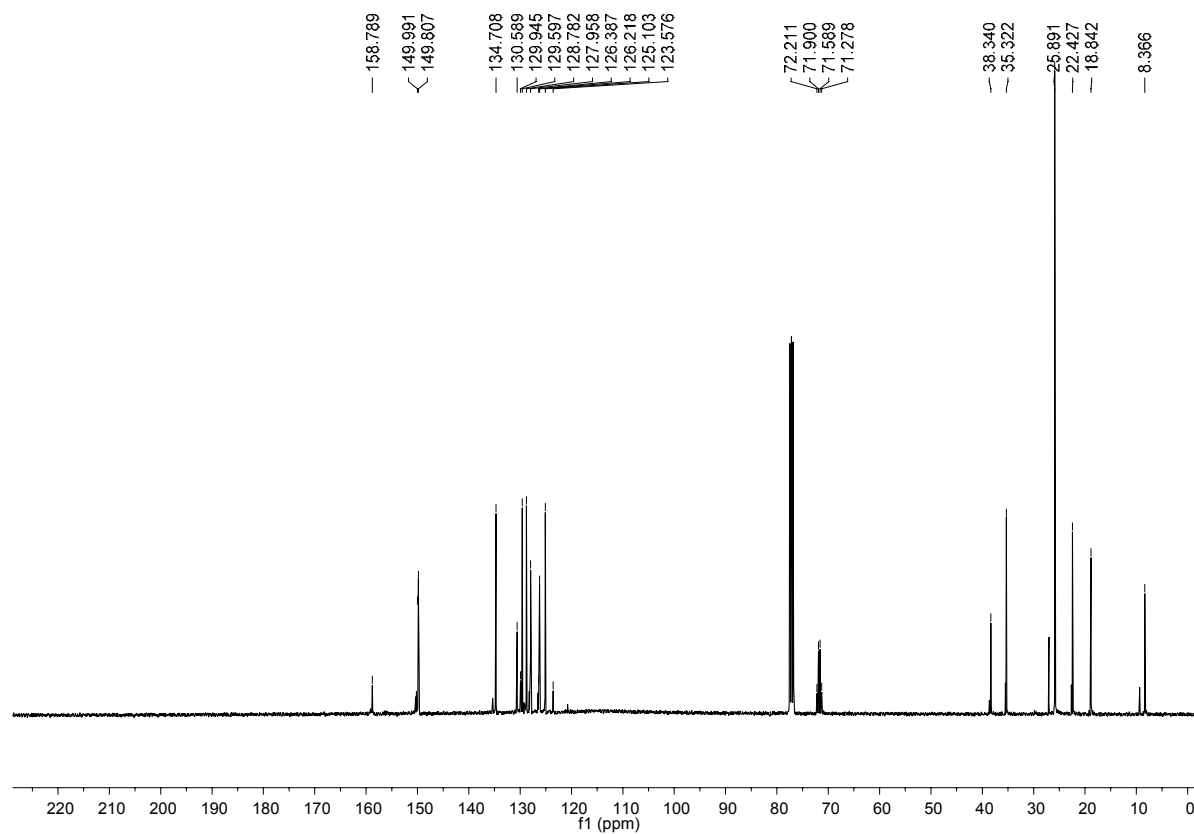 $(^{Si}R^*,R^*)\text{-15}$  ( $^{19}\text{F}$ ):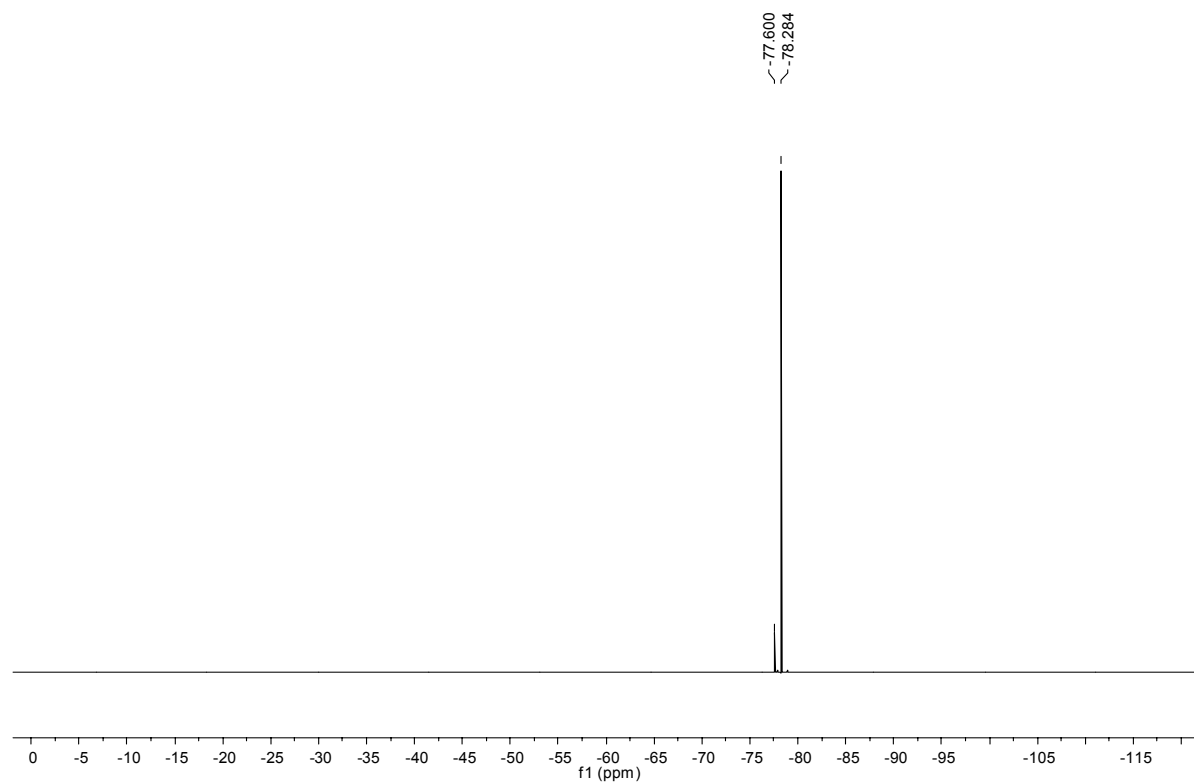

(<sup>Si</sup>R\*,R\*)-16 (<sup>1</sup>H):

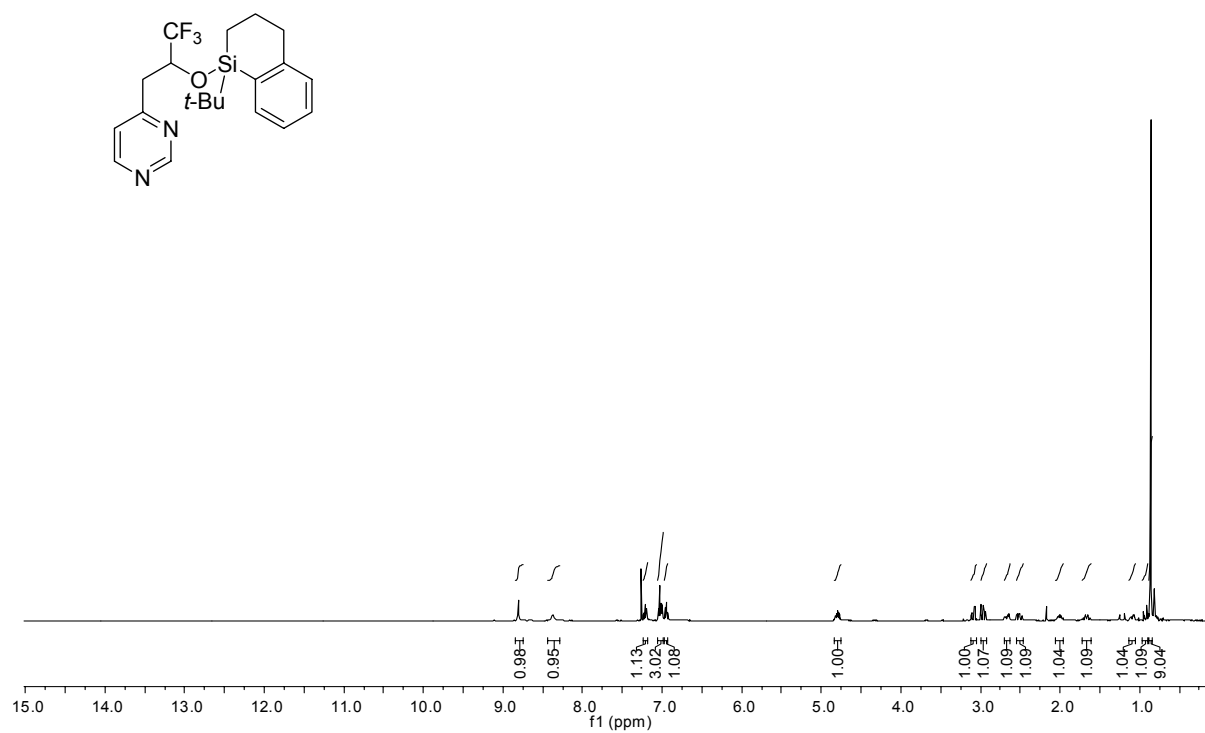

(<sup>Si</sup>R\*,R\*)-16 (<sup>13</sup>C):

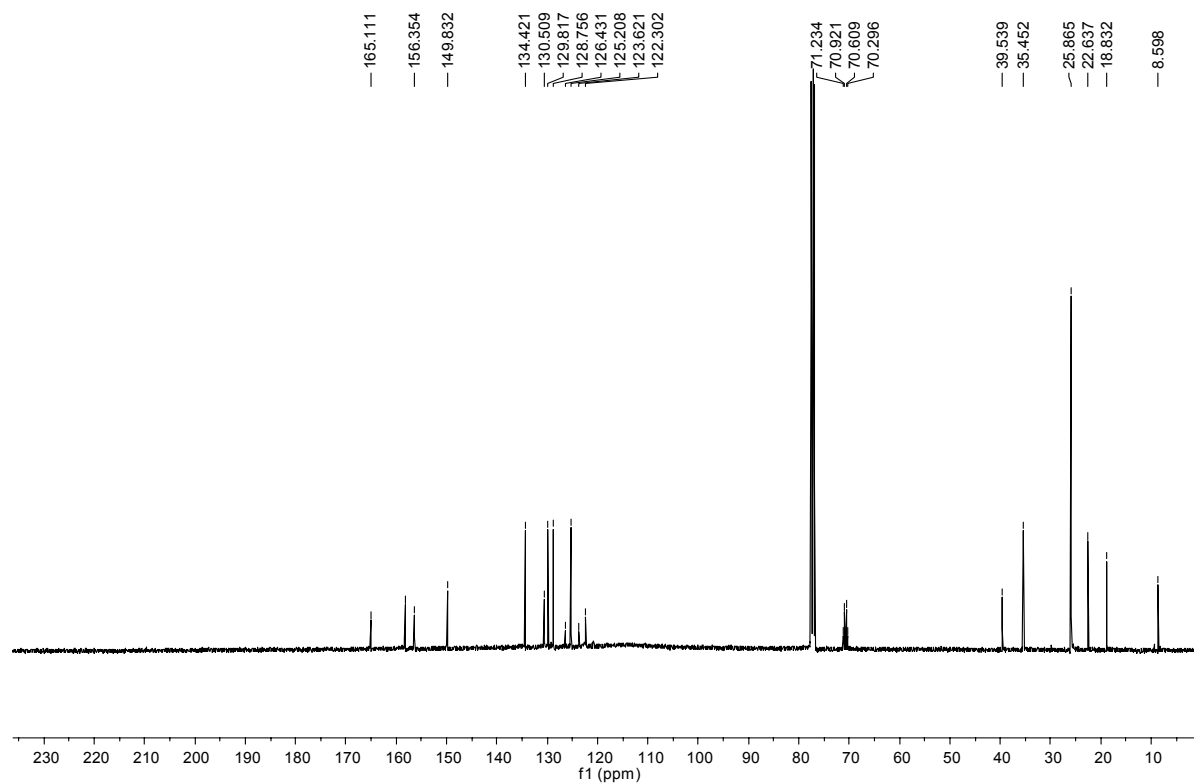

(<sup>Si</sup>R\*,R\*)-16 (<sup>19</sup>F):

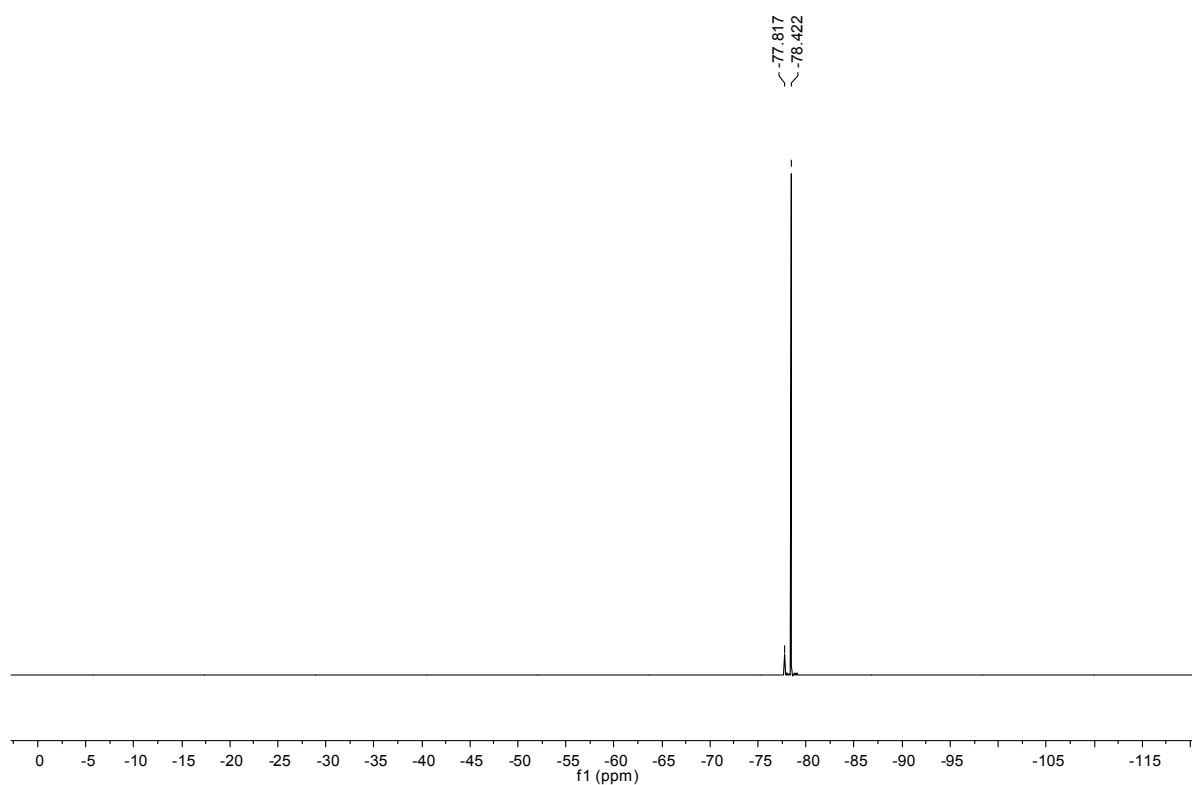

(<sup>Si</sup>R\*,R\*)-17 (<sup>1</sup>H):

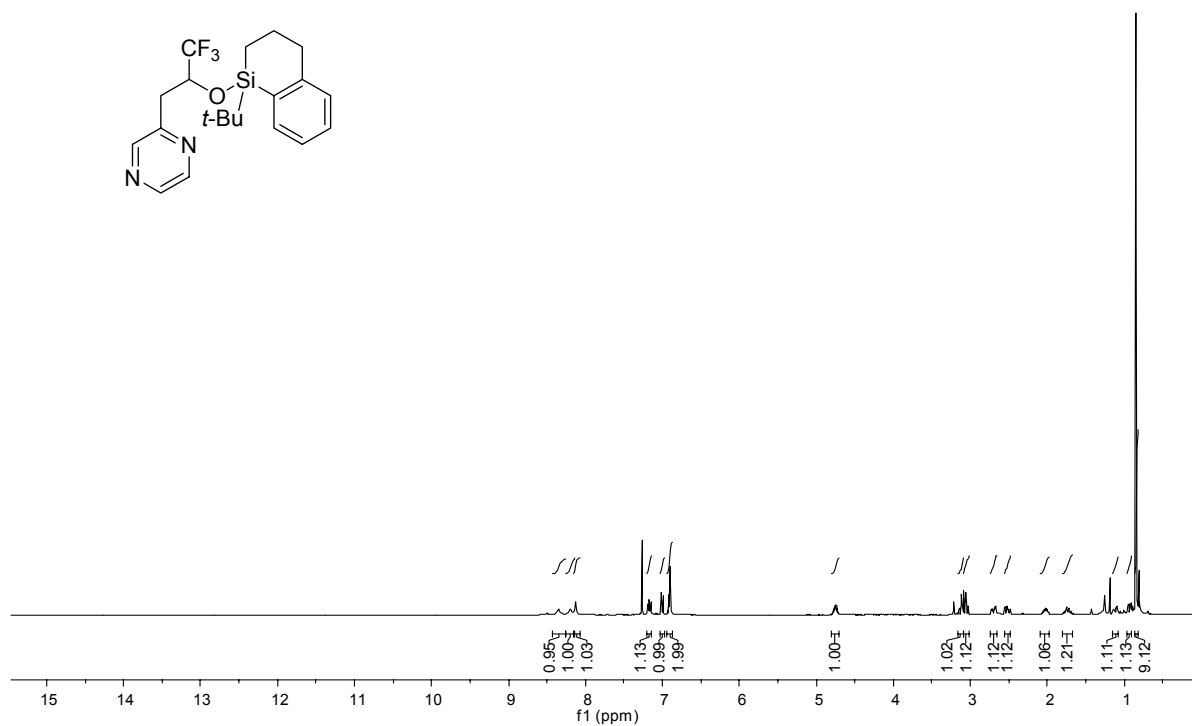

$(^{Si}R^*,R^*)\text{-17}$  ( $^{13}\text{C}$ ):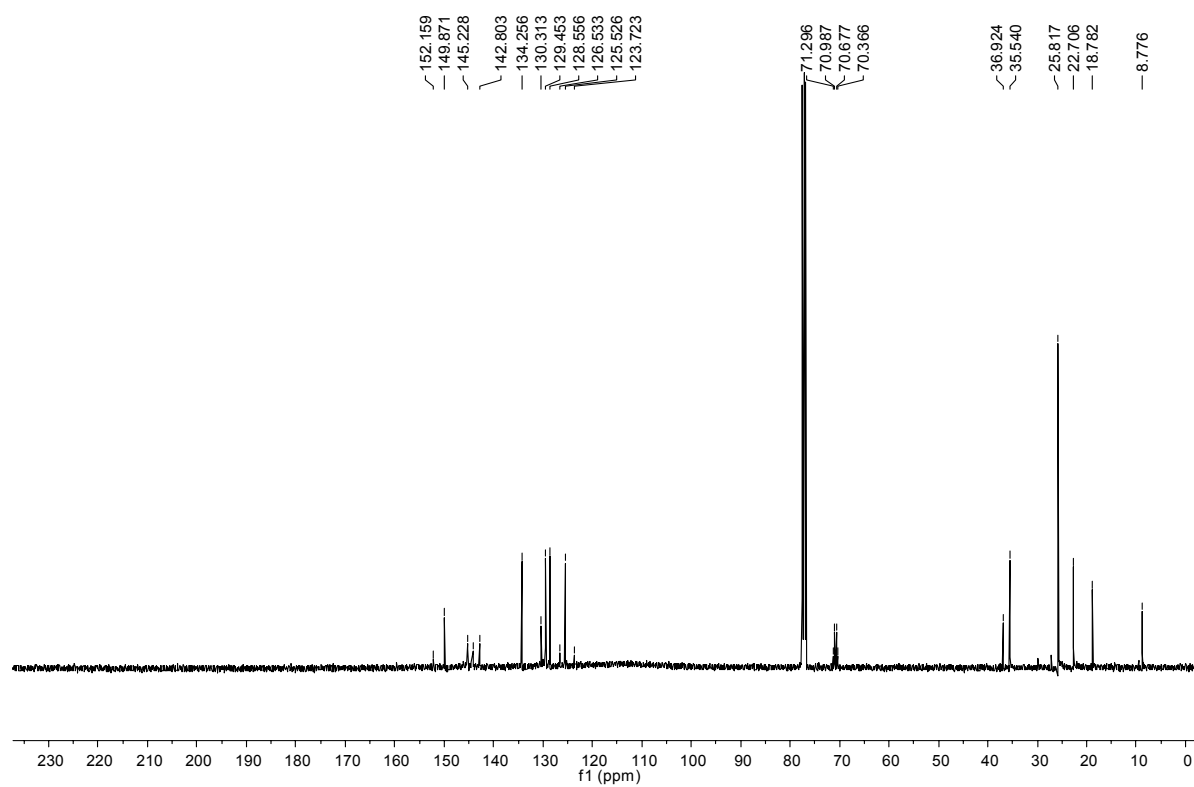 $(^{Si}R^*,R^*)\text{-17}$  ( $^{19}\text{F}$ ):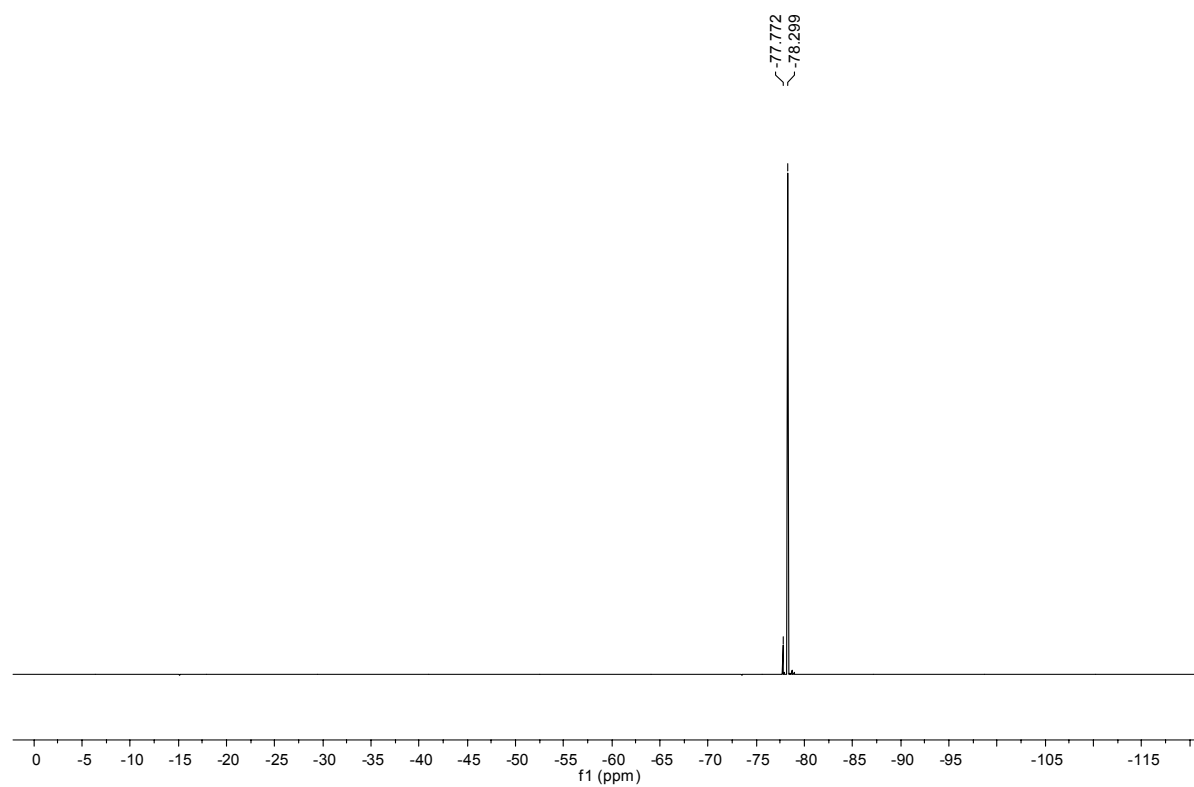

$(^{Si}R^*,R^*)$ -18 ( $^1H$ ):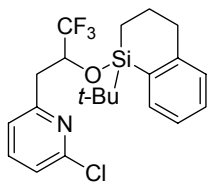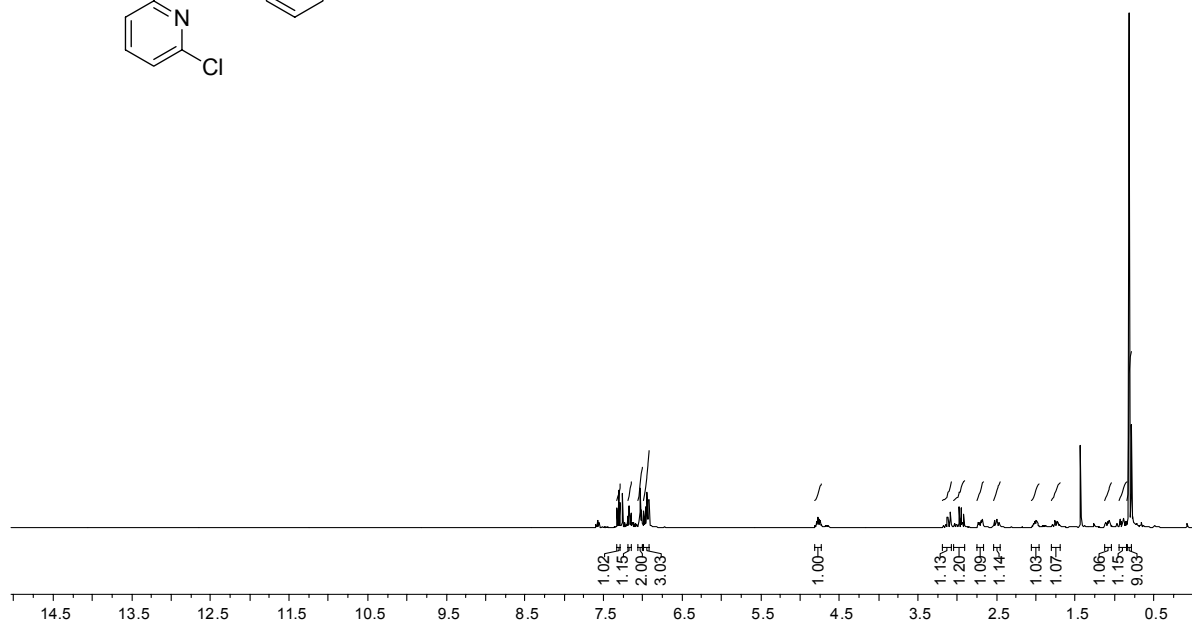 $(^{Si}R^*,R^*)$ -18 ( $^{13}C$ ):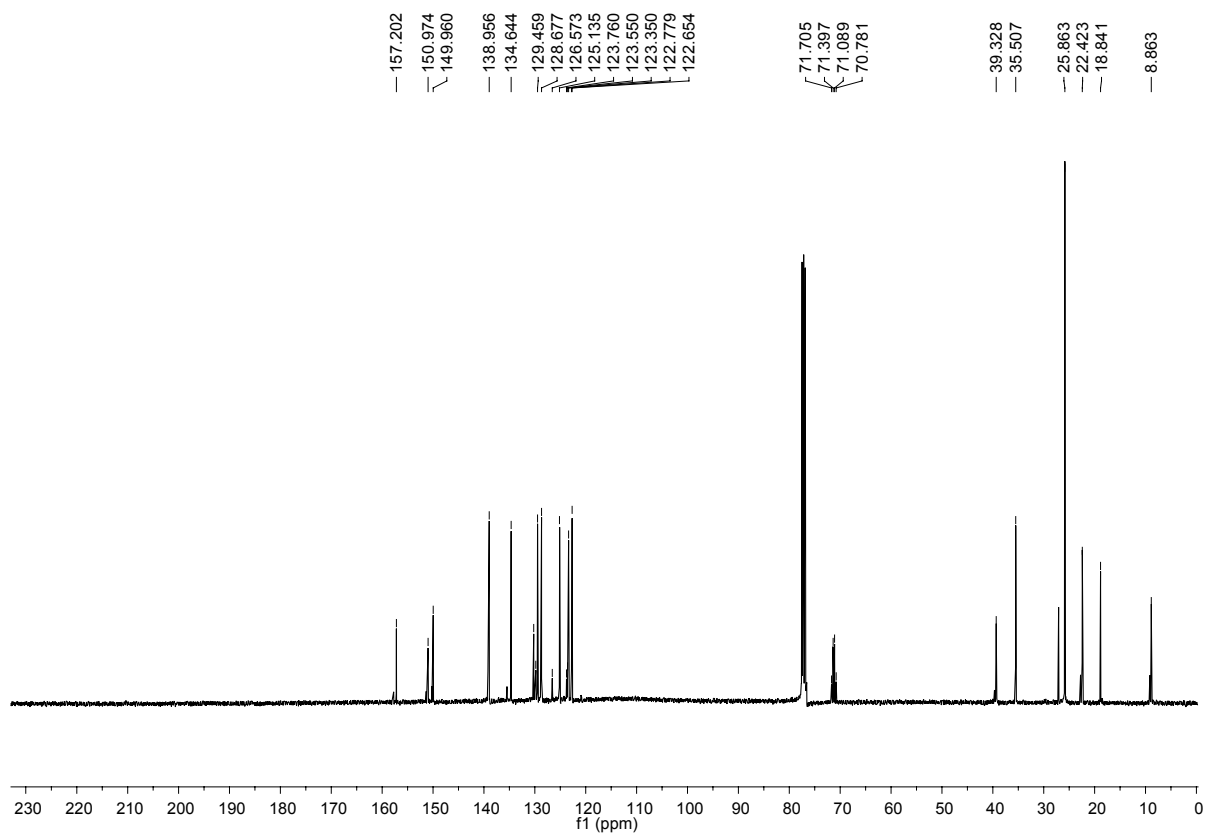



(<sup>Si</sup>R\*,R\*)-18 (<sup>19</sup>F):

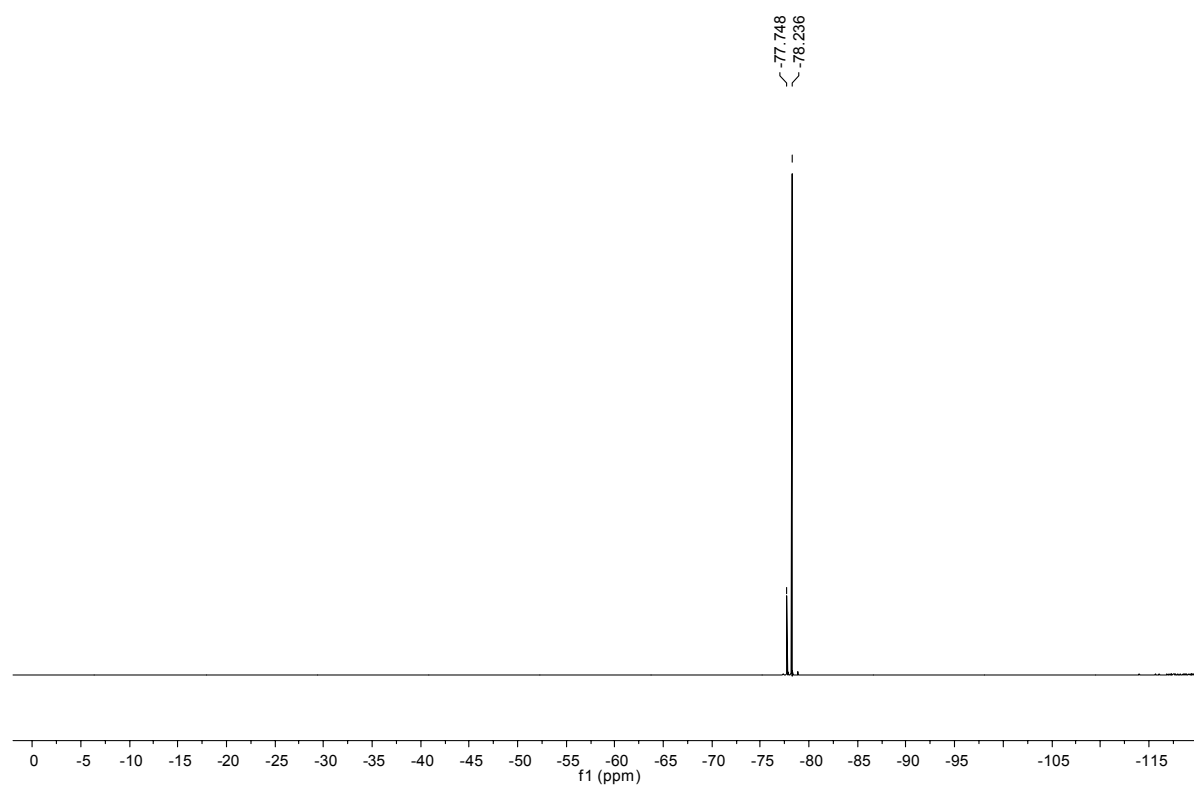

(<sup>Si</sup>R\*,R\*)-19 (<sup>1</sup>H):

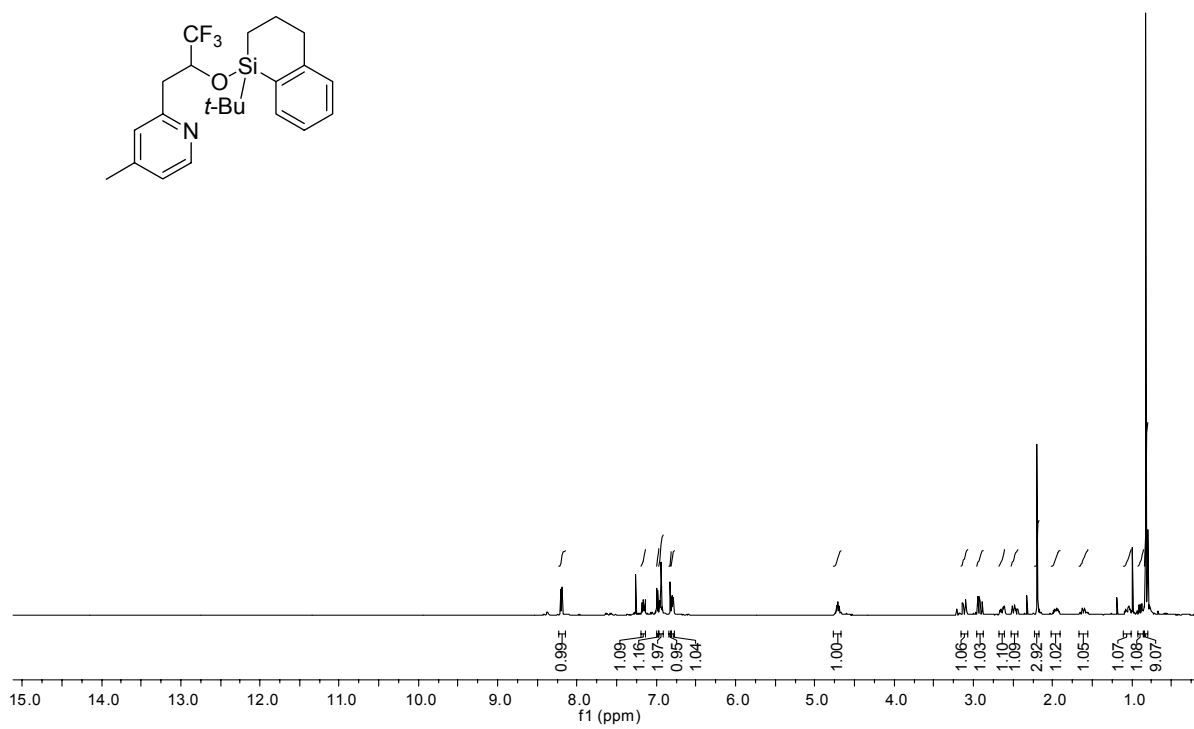

$(^{Si}R^*,R^*)\text{-19}$  ( $^{13}\text{C}$ ):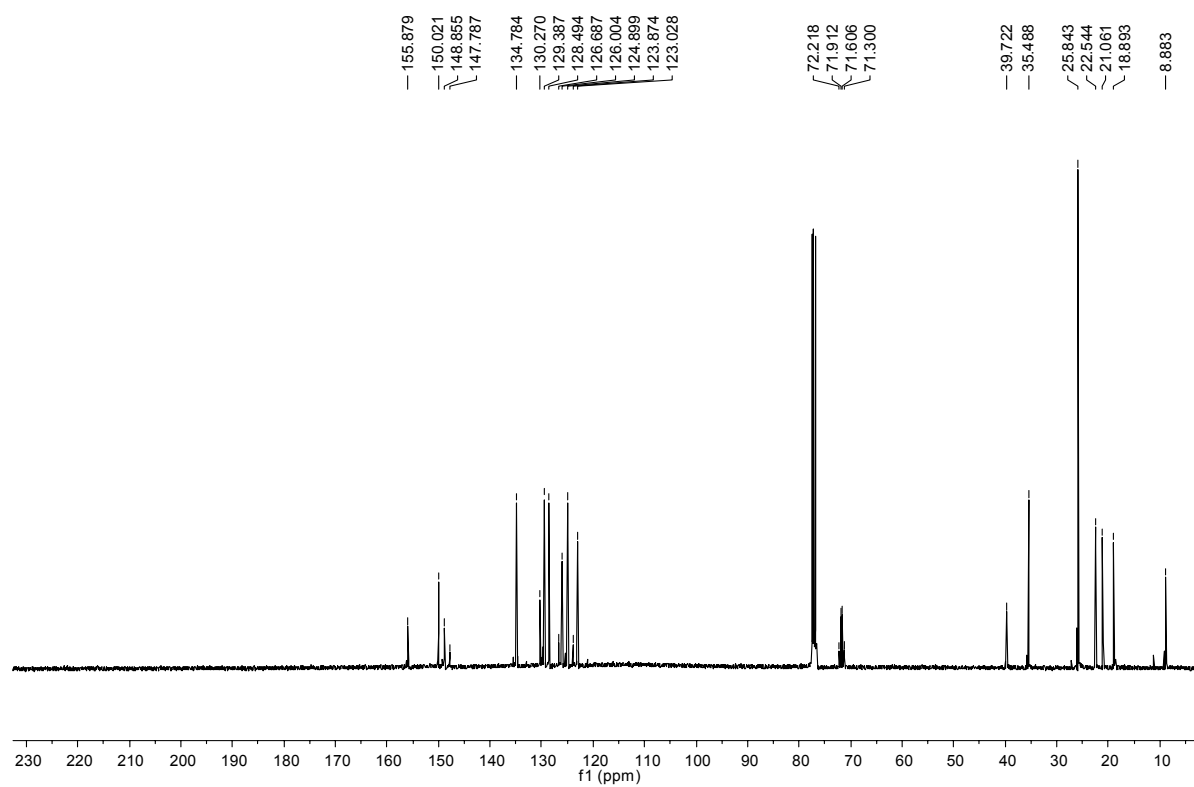 $(^{Si}R^*,R^*)\text{-19}$  ( $^{19}\text{F}$ ):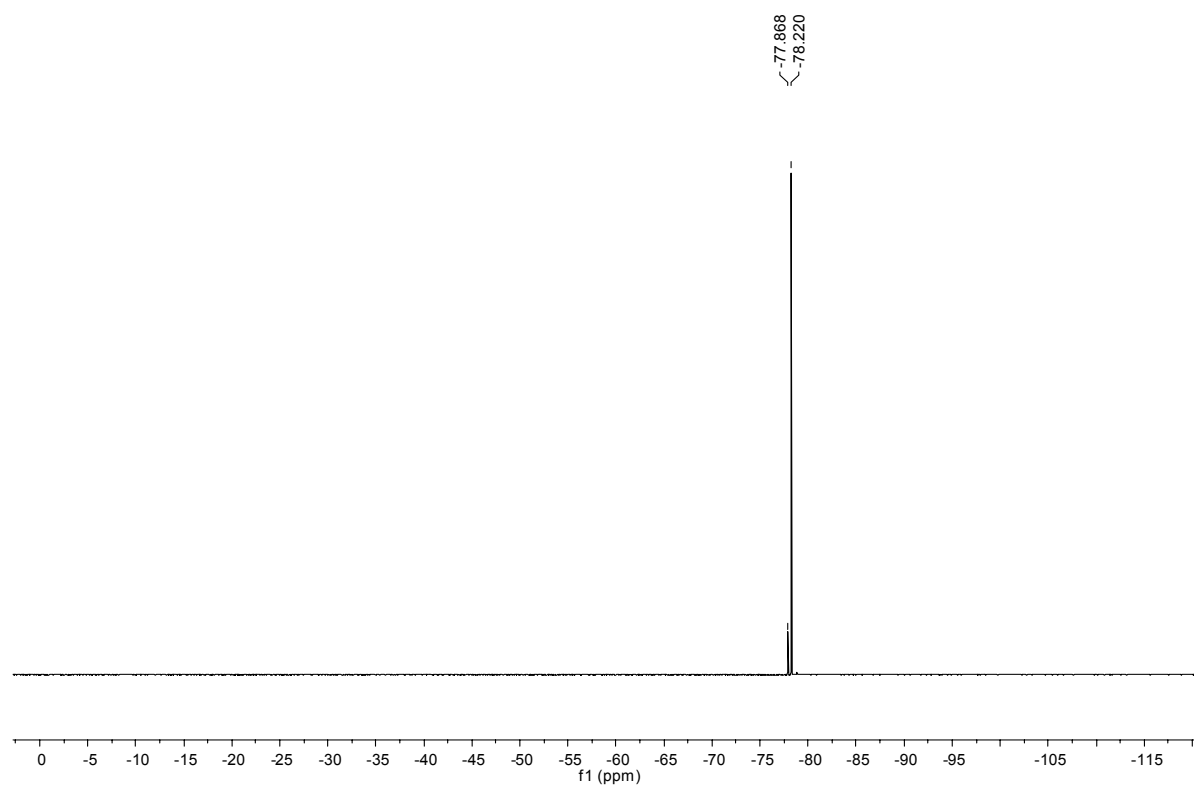

(<sup>Si</sup>R\*,R\*)-21 (<sup>1</sup>H):

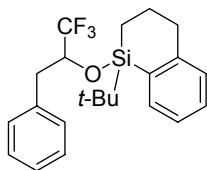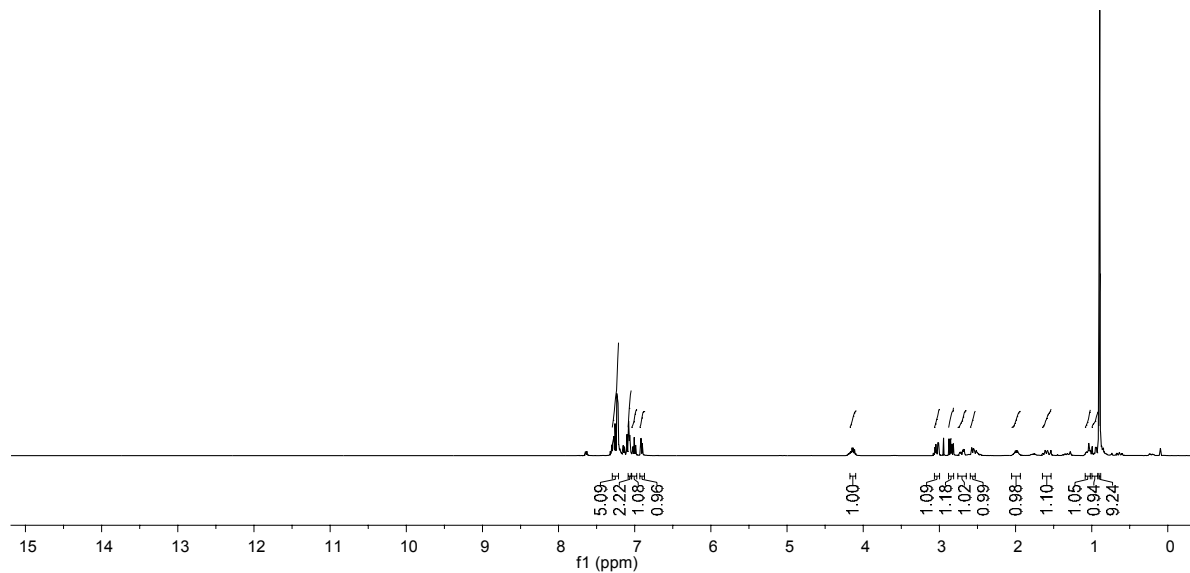

(<sup>Si</sup>R\*,R\*)-21 (<sup>13</sup>C):

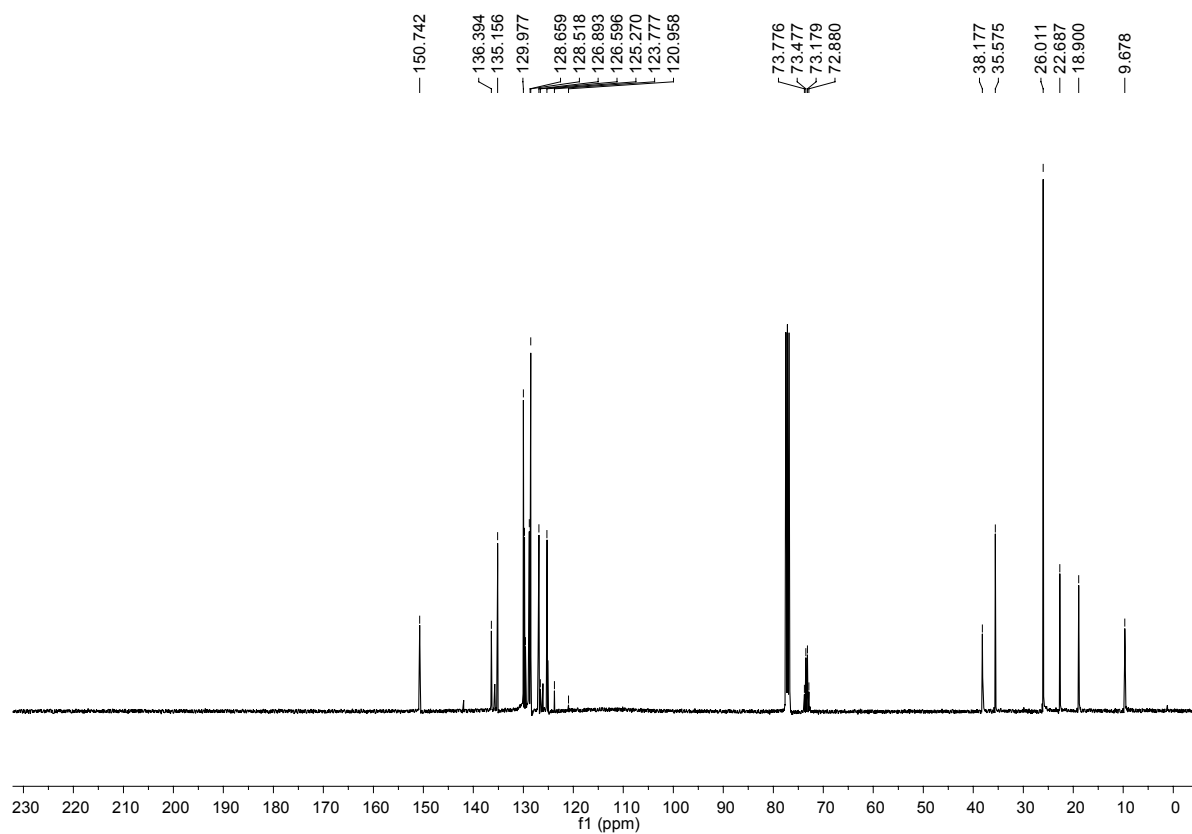

(<sup>Si</sup>R\*,R\*)-21 (<sup>19</sup>F):

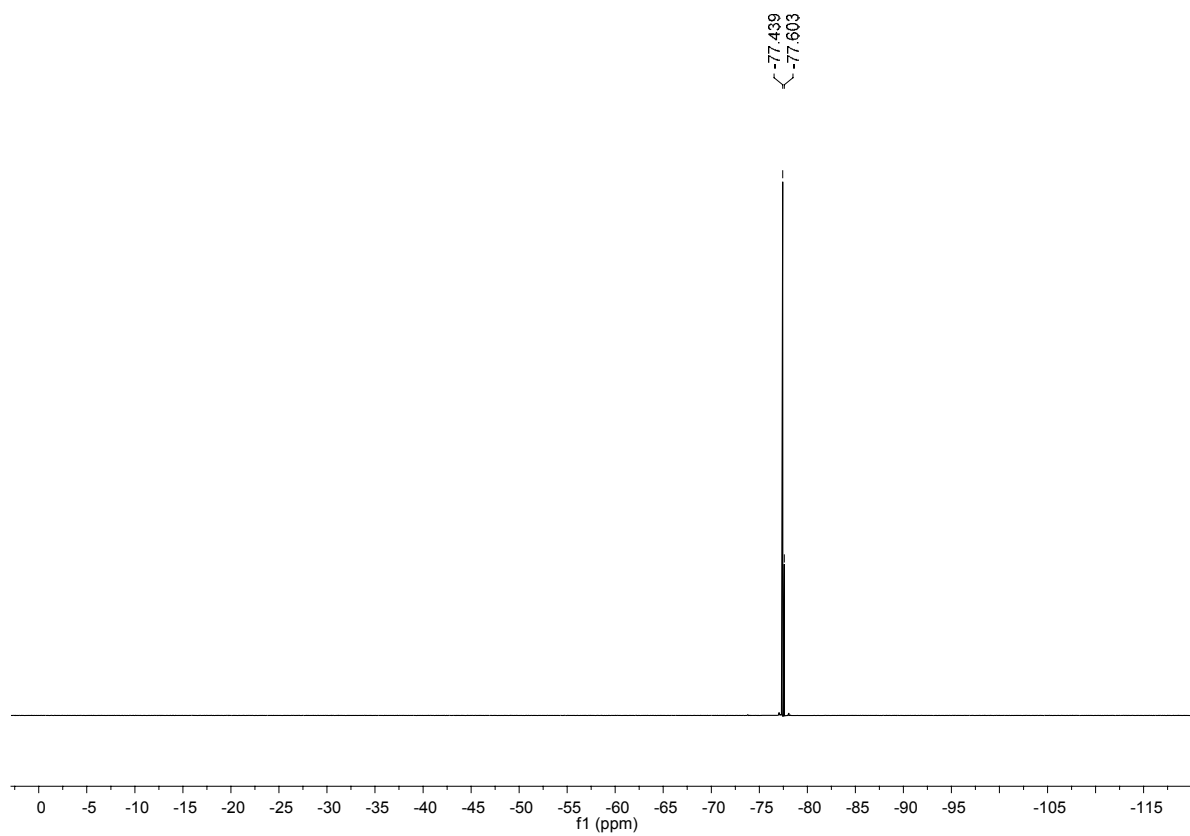

Supplement: b911534j.pdf [file b911534j.pdf]
